# Supplementary material for: Carbon footprints of commodity field crops in global markets
Source: Research Square preprint supplement (doi:10.21203/rs.3.rs-3359627/v1), 2023-11-16
Supplement: Supplementary file 1 [file 3ef2cf2fa31b81698a9ca2bd.xlsx]

## Sheet: Transportation calculations
Transportation type	Process (ecoinvent)	kg CO2e per t*km	Impact category
Train	market for transport, freight train | transport, freight train | APOS, U - RoW	0.04793	IPCC 2021 GWP 100 (according to UNFCCC/Kyoto Protocol)
Truck	market for transport, freight, lorry, unspecified | transport, freight, lorry, unspecified | APOS, U - RoW	0.13705	IPCC 2021 GWP 100 (according to UNFCCC/Kyoto Protocol)
Bulk vessel	transport, freight, sea, bulk carrier for dry goods | transport, freight, sea, bulk carrier for dry goods | APOS, U - GLO	0.00649	IPCC 2021 GWP 100 (according to UNFCCC/Kyoto Protocol)
Container ship	market for transport, freight, sea, container ship | transport, freight, sea, container ship | APOS, U - GLO	0.00932	IPCC 2021 GWP 100 (according to UNFCCC/Kyoto Protocol)
km within Canada to port	Thunder Bay	Vancouver
Truck	150	150
Train	1438	1201
Canadian transportation
To port	89.4808	78.1214	kg CO2e/tonne transported to port
Impact of production per tonne including soil carbon											Difference from lowest				Difference from lowest minus transportation to port					Bulk vessel transportation distance to break even					Distance to travel from Canadian port to port in each country						Break even distance minus actual distance				Number of extra trips before breaking even (leftover distance divided by distance to country)					Number of circumnavigations of the globe before break even					Relative contribution of transportation (of SK products transported to each location)
	SK	CA	CA-PP	AU	FR	DE	US		Lowest value	Location	AU	FR	DE	US	AU	FR	DE	US		AU	FR	DE	US		AU	FR	DE	US			AU	FR	DE	US	AU	FR	DE	US		AU	FR	DE	US		AU	FR	DE	US
Wheat	214.094	302.56	265.425	591.267	591.467	648.62	598.643	kg CO2e/tonne	214.094	SK	377.173	377.373	434.526	384.549	299.052	287.892	345.045	295.068		46078.8	44359.4	53165.7	45465	km	33339.7	9434.09	9037.76	2000	km		12739.1	34925.3	44127.9	43465	0.382101	3.70203	4.88262	21.7325		0.317882	0.871498	1.10113	1.08459		0.502649	0.222385	0.215051	0.057162
Peas	66.2255	131.71	101.172		639.506	1045.75	687.274	kg CO2e/tonne	66.2255	SK		573.28	979.523	621.049		483.799	890.043	531.568			74545.4	137141	81905.7	km	33339.7	9434.09	9037.76	2000	km			65111.3	128103	79905.7		6.9017	14.1742	39.9529			1.62474	3.19658	1.9939		0.765657	0.480392	0.469689	0.163878
Canola	371.952	548.343	395.137	528.65	1166.56	1380.9		kg CO2e/tonne	371.952	SK	156.698	794.608	1008.95		78.5761	705.127	919.467			12107.3	108648	141674		km	33339.7	9434.09	9037.76	2000	km		-21232.4	99214.1	132637			10.5166	14.6758				2.47571	3.30971			0.36778	0.141344	0.136215	0.0337202
Impact of production per tonne excluding soil carbon											Difference from SK				Difference from lowest minus transportation to port					Bulk vessel transportation distance to break even					Distance to travel from Canadian port to port in each country						Break even distance minus actual distance				Number of extra trips before breaking even (leftover distance divided by distance to country)					Number of circumnavigations of the globe before break even					Relative contribution of transportation (of SK products transported to each location)
	SK	CA	CA-PP	AU	FR	DE	US		Lowest value	Location	AU	FR	DE	US	AU	FR	DE	US		AU	FR	DE	US		AU	FR	DE	US			AU	FR	DE	US	AU	FR	DE	US		AU	FR	DE	US		AU	FR	DE	US
Wheat	358.781	376.612	363.061	561.8	493.373	477.13	542.124	kg CO2e/tonne	358.781	SK	203.019	134.592	118.349	183.343	124.898	45.1114	28.8683	93.8624		19244.7	6950.91	4448.12	14462.6	km	33339.7	9434.09	9037.76	2000	km		-14095	-2483.18	-4589.64	12462.6				6.23131					0.310982		0.376202	0.145776	0.140513	0.0349149
Peas	274.66	293.61	263.341		422.15	636.19	588	kg CO2e/tonne	263.341	CA-PP		147.49	361.53	313.34		58.0092	272.049	223.859			8938.24	41918.2	34492.9	km	33339.7	9434.09	9037.76	2000	km			-495.851	32880.4	32492.9			3.63812	16.2465				0.820473	0.810803		0.440651	0.182285	0.175975	0.0451259
Rapeseed	596.78	709.343	554.9	482.65	939.56	990.9		kg CO2e/tonne	482.65	AU	-114.13	342.78	394.12		-192.251	253.299	304.639			-29622.7	39029.1	46939.8		km	33339.7	9434.09	9037.76	2000	km		-62962.4	29595.1	37902			3.13703	4.19374				0.738492	0.945777			0.266093	0.0930495	0.0894903	0.0212871

## Sheet: wheat (consistent straw remov)
	Transportation	Seed	Fertilizer inputs	Manure inputs	Plant protection	Field activities	Irrigation	Post-harvest	Field-level CO2	Field-level N2O	Soil carbon	units	total (without soil carbon)	total (with soil carbon)	SK Net Total Emissions	SE	ANOVA	% change from SK without soil carbon	% change from SK with soil carbon	Total production (tonnes)	Weighting factor (unitless)	Weighted carbon footprint (without soil carbon change)	Weighted carbon footprint (with soil carbon change)		Transportation	Seed	Fertilizer inputs	Manure	Plant protection	Field activities	Irrigation	Post-harvest	Field-level CO2	Field-level N2O	Soil carbon
SK	0.00125284	0.0182258	0.111368	0	0.00604048	0.0253253	0	0.00184943	0.0260561	0.168663	-0.144687	kg CO2e/kg canola	0.358781	0.214094	0.214094	0.00145556	a	0	0						0.00349193	0.0507993	0.310408	0	0.0168361	0.070587	0	0.00515476	0.0726239	0.470099	-0.403273
CA	0.00177758	0.019118	0.0814783	0.00239429	2.33683e-06	0.0580978	0.000272078	0.000489741	0.019372	0.19361	-0.0740523	kg CO2e/kg canola	0.376612	0.30256	0.214094	0.00135643	b	0.0496995	0.41321	2.61858e+07	0.171892	0.0647367	0.0520077		0.00471992	0.0507632	0.216345	0.00635744	6.20486e-06	0.154264	0.000722436	0.00130038	0.0514374	0.514083	-0.196627
CA-PP	0.00143295	0.0189004	0.111044	0	0.00460719	0.0239066	0.000272078	0.000489741	0.0227639	0.179644	-0.0976359	kg CO2e/kg canola	0.363061	0.265425	0.214094	0.0014074	b
AU	0.00314146	0.120189	0.0874888	0.00405297	0.00514353	0.095253	0.00190441	0.0581903	0.103571	0.0828661	0.0294668	kg CO2e/kg canola	0.5618	0.591267	0.214094	0.00390484	c	0.565859	1.76172	2.3352e+07	0.153291	0.0861189	0.0906359		0.00559177	0.213936	0.155729	0.00721426	0.00915544	0.169549	0.00338983	0.103578	0.184355	0.147501	0.0524507
FR	0.0028544	0.00971348	0.0867822	0.0057088	0.00160471	0.0431426	8.65276e-05	0.0734049	0.0363403	0.233735	0.0980941	kg CO2e/kg canola	0.493373	0.591467	0.214094	0.00202364	d	0.375138	1.76265	34050960	0.223522	0.11028	0.132206		0.00578548	0.0196879	0.175896	0.011571	0.00325253	0.0874442	0.00017538	0.148782	0.0736569	0.473749	0.198823
DE	0.00478613	0.00895105	0.0843432	0.0102217	0.00326135	0.0439929	1.34831e-10	0.0601302	0.0346747	0.226769	0.17149	kg CO2e/kg canola	0.47713	0.64862	0.214094	0.00383508	e	0.329865	2.0296	21755200	0.142809	0.0681383	0.0926286		0.0100311	0.0187602	0.176772	0.0214233	0.00683534	0.0922031	2.82587e-10	0.126025	0.0726736	0.475277	0.35942
US	0.00418173	0.0322913	0.117609	0.0104456	0.00209954	0.0988865	2.86301e-10	0.0615286	0.068261	0.146821	0.0565185	kg CO2e/kg canola	0.542124	0.598643	0.214094	0.00311313	f	0.511017	1.79617	4.69942e+07	0.308486	0.167238	0.184673		0.00771359	0.0595643	0.216941	0.019268	0.0038728	0.182406	5.28109e-10	0.113495	0.125914	0.270825	0.104254
																						0.496511	0.552151
	Old grain allocation	Old straw allocation	New grain allocation	New straw allocation						0.000747959												0.277396	0.612254
SK	0.635728	0.364272	0.948173	0.0518272
CA	0.522739	0.477261	0.948173	0.0518272
AU	0.583771	0.416229	0.950204	0.049796
FR	0.673401	0.326599	0.956296	0.0437044
DE	0.682128	0.317872	0.963055	0.0369454
US	0.546448	0.453552	0.948173	0.0518272
Average			0.954903	0.0450969
	Transportation	Seed	Fertilizer inputs	Manure inputs	Plant protection	Field activities	Irrigation	Post-harvest	Field-level CO2	Field-level N2O	Soil carbon	units	total (without soil carbon)	total (with soil carbon)	SK Net Total Emissions					Total production (tonnes)	Weighting factor (unitless, without CA)	Weighted carbon footprint (without soil carbon change), without CA	Weighted carbon footprint (with soil carbon change), without CA
SK	1.25284	18.2258	111.368	0	6.04048	25.3253	0	1.84943	26.0561	168.663	-144.687	kg CO2e/kg canola	358.781	214.094	214.094
CA	1.77758	19.118	81.4783	2.39429	0.00233683	58.0978	0.272078	0.489741	19.372	193.61	-74.0523	kg CO2e/kg canola	376.612	302.56	214.094					2.61858e+07
CA-PP	1.43295	18.9004	111.044	0	4.60719	23.9066	0.272078	0.489741	22.7639	179.644	-97.6359	#VALUE!	363.061	265.425	214.094
AU	3.14146	120.189	87.4888	4.05297	5.14353	95.253	1.90441	58.1903	103.571	82.8661	29.4668	kg CO2e/kg canola	561.8	591.267	214.094					2.3352e+07	0.18511	103.995	109.449
FR	2.8544	9.71348	86.7822	5.7088	1.60471	43.1426	0.0865276	73.4049	36.3403	233.735	98.0941	kg CO2e/kg canola	493.373	591.467	214.094					34050960	0.269919	133.171	159.648
DE	4.78613	8.95105	84.3432	10.2217	3.26135	43.9929	1.34831e-07	60.1302	34.6747	226.769	171.49	kg CO2e/kg canola	477.13	648.62	214.094					21755200	0.172452	82.2819	111.856
US	4.18173	32.2913	117.609	10.4456	2.09954	98.8865	2.86301e-07	61.5286	68.261	146.821	56.5185	kg CO2e/kg canola	542.124	598.643	214.094					4.69942e+07	0.372519	201.952	223.006
																						521.399	603.959

## Sheet: peas
	Transportation	Seed	Fertilizer inputs	Manure inputs	Inoculant inputs	Plant protection	Field activities	Irrigation	Post-harvest	Field-level CO2	Field-level N2O	N credit	Soil carbon	units	total (without soil carbon)	total (with soil carbon)	SE	SK Net Total Emissions	ANOVA	% change from SK without soil carbon	% change from SK with soil carbon	Total production (tonnes)	Weighting factor (unitless)	Weighted carbon footprint (without soil carbon change)	Weighted carbon footprint (with soil carbon change)		Transportation	Seed	Fertilizer inputs	Manure	Inoculant inputs	Plant protection	Field activities	Irrigation	Post-harvest	Field-level CO2	Field-level N2O	N credit	Soil carbon
SK	0.0014	0.01222	0.03167	0	0.00088	0.01139	0.04066	0	0.00101	0.0003	0.18554	-0.01041	-0.208435	kg CO2e/kg peas	0.27466	0.0662255	0.000390705	0.0662255	a	0	0						0.00509721	0.0444914	0.115306	0	0.00320396	0.0414695	0.148038	0	0.00367727	0.00109226	0.675526	-0.0379014	-0.758882
CA	0.00169	0.01156	0.03408	0	0.00086	0.00882	0.04559	0	0.00017	0.00025	0.20151	-0.01092	-0.1619	kg CO2e/kg peas	0.29361	0.13171	0.000402696	0.0662255	b	0.0689944	0.988811	3.65102e+06	0.694582	0.203936	0.0914834		0.00575593	0.039372	0.116072	0	0.00292906	0.0300398	0.155274	0	0.000578999	0.00085147	0.686319	-0.0371922	-0.551412
CA-PP	0.00166	0.01087	0.0334	0	0.00084	0.00869	0.0447	0	0.00017	0.00024	0.173901	-0.01113	-0.162169	kg CO2e/kg peas	0.263341	0.101172	0.000406433	0.0662255	b
FR	0.00535	0.01409	0.0507	0.01226	0.00059	0.01227	0.07801	0.00191	0.00598	0.0526	0.20175	-0.01336	0.217356	kg CO2e/kg peas	0.42215	0.639506	0.00456139	0.0662255	c	0.536991	8.65649	612000	0.116429	0.0491505	0.074457		0.0126732	0.0333768	0.120099	0.0290418	0.00139761	0.0290655	0.184792	0.00452446	0.0141656	0.1246	0.477911	-0.0316475	0.514878
DE	0.01051	0.02053	0.08231	0.02508	0.00063	0.01132	0.08569	0	0	0.0589	0.35398	-0.01276	0.409559	kg CO2e/kg peas	0.63619	1.04575	0.00452951	0.0662255	d	1.31628	14.7907	273400	0.0520125	0.0330899	0.0543921		0.0165202	0.0322702	0.12938	0.0394222	0.00099027	0.0177934	0.134692	0	0	0.0925824	0.556406	-0.0200569	0.643768
US	0.00757	0.00838	0.09798	0.01841	0.00105	0.01744	0.0962	0.00736	0.00041	0.098	0.25095	-0.01575	0.0992743	kg CO2e/kg peas	0.588	0.687274	0.00590271	0.0662255	e	1.14083	9.37779	720005	0.136976	0.080542	0.0941402		0.0128741	0.0142517	0.166633	0.0313095	0.00178571	0.0296599	0.163605	0.012517	0.000697279	0.166667	0.426786	-0.0267857	0.168834
																								0.366719	0.314473
																								0.251033	0.789408
	Transportation	Seed	Fertilizer inputs	Manure inputs	Inoculant inputs	Plant protection	Field activities	Irrigation	Post-harvest	Field-level CO2	Field-level N2O	N credit	Soil carbon	units	total (without soil carbon)	total (with soil carbon)	SE	SK Net Total Emissions				Total production (tonnes)	Weighting factor (unitless), without CA	Weighted carbon footprint (without soil carbon change), without CA	Weighted carbon footprint (with soil carbon change), without CA
SK	1.4	12.22	31.67	0	0.88	11.39	40.66	0	1.01	0.3	185.54	-10.41	-208.435	kg CO2e/kg canola	274.66	66.2255	0.390705	66.2255
CA	1.69	11.56	34.08	0	0.86	8.82	45.59	0	0.17	0.25	201.51	-10.92	-161.9	kg CO2e/kg canola	293.61	131.71	0.402696	66.2255				3.65102e+06
CA-PP	1.66	10.87	33.4	0	0.84	8.69	44.7	0	0.17	0.24	173.901	-11.13	-162.169	kg CO2e/kg canola	263.341	101.172	0.406433	66.2255
FR	5.35	14.09	50.7	12.26	0.59	12.27	78.01	1.91	5.98	52.6	201.75	-13.36	217.356	kg CO2e/kg canola	422.15	639.506	4.56139	66.2255				612000	0.381212	160.929	243.787
DE	10.51	20.53	82.31	25.08	0.63	11.32	85.69	0	0	58.9	353.98	-12.76	409.559	kg CO2e/kg canola	636.19	1045.75	4.52951	66.2255				273400	0.1703	108.343	178.091
US	7.57	8.38	97.98	18.41	1.05	17.44	96.2	7.36	0.41	98	250.95	-15.75	99.2743	kg CO2e/kg canola	588	687.274	5.90271	66.2255				720005	0.448488	263.711	308.234
																								532.983	730.112

## Sheet: canola
	Transportation	Seed	Fertilizer inputs	Manure inputs	Plant protection	Field activities	Irrigation	Post-harvest	Field-level CO2	Field-level N2O	Soil carbon change	units	total without soil carbon	total with soil carbon	SK Net Total Emissions	SE	ANOVA	% change from SK without soil carbon	% change from SK with soil carbon	Total production (tonnes)	Weighting factor (unitless)	Weighted carbon footprint (without soil carbon change)	Weighted carbon footprint (with soil carbon change)		Transportation	Seed	Fertilizer inputs	Manure	Plant protection	Field activities	Irrigation	Post-harvest	Field-level CO2	Field-level N2O	Soil carbon
SK	0.0015	0.00511	0.15925	0	0.00722	0.03699	0	0.00195	0.02982	0.35494	-0.224828	kg CO2e/kg canola	0.59678	0.371952	0.371952	0.0117622	a	0	0						0.00251349	0.00856262	0.266849	0	0.0120983	0.0619826	0	0.00326754	0.0499682	0.594759	-0.376734
CA	0.0015228	0.00595	0.19146	0	0.0126	0.0381198	0.00061	0.01168	0.04491	0.40249	-0.161	kg CO2e/kg canola	0.709343	0.548343	0.371952	0.0173401	b	0.188617	0.474228	18595379	0.628116	0.44555	0.344423		0.00214678	0.00838805	0.269912	0	0.0177629	0.0537396	0.000859951	0.016466	0.0633121	0.567413	-0.226971
CA-PP	0.00174	0.00579	0.18555	0	0.00678	0.03848	0.00061	0.00195	0.041	0.273	-0.159763	kg CO2e/kg canola	0.5549	0.395137	0.371952	0.00494223	b
AU	0.00306	0.00373	0.12612	0	0.02298	0.14478	0	0.01303	0.11757	0.05138	0.046	kg CO2e/kg canola	0.48265	0.52865	0.371952	0.0167174	c	-0.191243	0.421284	3.52541e+06	0.119082	0.0574748	0.0629525		0.00634	0.00772817	0.261307	0	0.0476121	0.299969	0	0.0269968	0.243593	0.106454	0.0953072
FR	0.00518	0.00137	0.22611	0.01319	0.01501	0.09776	0.00036	0.00343	0.03033	0.54682	0.227	kg CO2e/kg canola	0.93956	1.16656	0.371952	0.0368899	d	0.574383	2.13631	3918400	0.132356	0.124356	0.154401		0.00551322	0.00145813	0.240655	0.0140385	0.0159756	0.104049	0.000383158	0.00365064	0.0322811	0.581996	0.241602
DE	0.0109	0.00223	0.23991	0.02326	0.01481	0.09811	0.00759	0.00858	0.04281	0.5427	0.39	kg CO2e/kg canola	0.9909	1.3809	0.371952	0.0436679	e	0.660411	2.71257	3565800	0.120446	0.11935	0.166324		0.0110001	0.00225048	0.242113	0.0234736	0.014946	0.099011	0.0076597	0.0086588	0.0432031	0.547684	0.393582
																						0.746731	0.728101
																						0.20081	0.489147
	Transportation	Seed	Fertilizer inputs	Manure inputs	Plant protection	Field activities	Irrigation	Post-harvest	Field-level CO2	Field-level N2O	Soil carbon change	units	total without soil carbon	total with soil carbon	SK Net Total Emissions					Total production (tonnes)	Weighting factor - SK compared to GWA without Canada	Weighted carbon footprint without soil carbon, without Canada	Weighted carbon footprint without Canada (with soil carbon change)
SK	1.5	5.11	159.25	0	7.22	36.99	0	1.95	29.82	354.94	-224.828	kg CO2e/kg canola	596.78	371.952	371.952
CA	1.5228	5.95	191.46	0	12.6	38.1198	0.61	11.68	44.91	402.49	-161	kg CO2e/kg canola	709.343	548.343	371.952					18595379
CA-PP	1.74	5.79	185.55	0	6.78	38.48	0.61	1.95	41	273	-159.763	kg CO2e/kg canola	554.9	395.137	371.952
AU	3.06	3.73	126.12	0	22.98	144.78	0	13.03	117.57	51.38	46	kg CO2e/kg canola	482.65	528.65	371.952					3.52541e+06	0.320212	154.55	169.28
FR	5.18	1.37	226.11	13.19	15.01	97.76	0.36	3.43	30.33	546.82	227	kg CO2e/kg canola	939.56	1166.56	371.952					3918400	0.355907	334.396	415.187
DE	10.9	2.23	239.91	23.26	14.81	98.11	7.59	8.58	42.81	542.7	390	kg CO2e/kg canola	990.9	1380.9	371.952					3565800	0.323881	320.933	447.247
																						809.88	1031.71
