# Supplementary material for: Carbon footprints of commodity field crops in global markets
Source: Research Square preprint supplement (doi:10.21203/rs.3.rs-3359627/v1), 2023-11-16
Supplement: Supplementary file 2 [file 4d12961fff85841d6c4dd41a.docx]

**Supplementary Information 1: Detailed LCI and LCIA Results**

# Results and discussion

## Life cycle inventory

### Rapeseed

Germany had the highest rapeseed yields (3360 kg/ha), followed by France (3210 kg/ha), Canada (2145.2 kg/ha), and Saskatchewan (2118.8 kg/ha). Australia had the lowest (1387.5 kg/ha) (Table 1). Seed inputs were similar between regions, ranging from 0.001-0.003 kg/kg yield. Lime was only applied in Australia and Germany, ranging from 0.1-0.19 kg/kg. France and Germany had the highest N fertilizer application rates (0.145 and 0.14 kg/kg), and Saskatchewan and Australia had the lowest (0.057 and 0.056 kg/kg). P fertilizer application rates were fairly similar, ranging from 0.02 kg/kg in Germany to 0.031 kg/kg in Saskatchewan. K and S fertilizer rates were more variable, with K fertilizer application rates ranging from 0.00g kg/kg in Canada and Australia to 0.039 kg/kg in France, and S fertilizers ranging from 0.008 kg/kg in Australia to 0.042 kg/kg in Saskatchewan. France and Germany were the only countries with manure application to rapeseed production. French rapeseed received 0.334 kg/kg of pig manure and 0.101 kg/kg of poultry manure. German rapeseed had a similar poultry manure application rate to France (0.09 kg/kg) and around a 3 times higher pig manure application rate than France (1.05 kg/kg). Total pesticide active ingredient application rates were very similar, ranging from 0.001 kg/kg in Saskatchewan to 0.002 kg/kg in all other regions.

Irrigation energy was only used for Canadian, French and German rapeseed production, ranging from 0.007 MJ/kg in France to 0.05 MJ/kg in Germany. Australia had the highest energy use for field activities (1.791 MJ/kg), followed by Germany and France (1.21 MJ/kg), and Canada and Saskatchewan had the lowest (0.472 MJ/kg and 0.458 MJ/kg). Saskatchewan had the lowest post-harvest energy use (0.003 MJ/kg), and Germany had the most (0.32 MJ/kg). All transportation distances were assumed to be the same (30 km for manure and 50 km for all other inputs) due to lack of region-specific data. Saskatchewan, Canada and Australia have much lower amounts of inputs transported to the lack of manure application, compared to France and Germany.

Australia has the lowest N2O emissions (1.88x10-4 kg/kg), due to their relatively dry climate and lack of tillage for rapeseed. France and Germany (0.002 kg/kg) have double the N2O emissions of Canada and Saskatchewan (0.001 kg/kg), due to higher N inputs, more field activities, and differences in soil and climate. Australia has the highest levels of field-level CO2 emissions (0.118 kg/kg) since they have the highest inputs of lime. Germany also has lime inputs and has the second highest field-level CO2 emissions (0.09 kg/kg). Saskatchewan, Canada and France do not have lime inputs and thus have lower field-level CO2 emissions (0.03-0.045 kg/kg). Canadian and Saskatchewan soils are sequestering carbon (-0.225 and -0.161 kg CO2/kg), while all other countries have net carbon emissions from soils. France and Germany have higher emissions (0.227 and 0.390 kg CO2/kg), and Australia has lower emissions (0.046 kg CO2/kg).

Table 1. Life cycle inventory data for rapeseed production

|  | **Saskatchewan** | **Canada** | **Prairie Provinces** | **Australia** | **France** | **Germany** |
| --- | --- | --- | --- | --- | --- | --- |
| Yield (kg/ha) | 2118.8 | 2145.2 | 2123.0 | 1387.5 | 3210 | 3360 |
| Seed (kg/kg) | 0.003 | 0.003 | 0.003 | 0.002 | 0.001 | 0.001 |
| Lime (kg/kg) | 0 | 0 | 0 | 0.190 | 0 | 0.10 |
| N fertilizers (kg/kg) | 0.057 | 0.091 | 0.079 | 0.056 | 0.145 | 0.14 |
| P fertilizers (kg/kg) | 0.031 | 0.030 | 0.031 | 0.029 | 0.027 | 0.02 |
| K fertilizers (kg/kg) | 0.009 | 0.006 | 0.010 | 0.006 | 0.039 | 0.06 |
| S fertilizers (kg/kg) | 0.042 | 0.015 | 0.042 | 0.008 | 0.003 | 0.01 |
| Pig manure (kg/kg) | 0 | 0 | 0 | 0 | 0.334 | 1.05 |
| Poultry manure (kg/kg) | 0 | 0 | 0 | 0 | 0.101 | 0.09 |
| Total pesticide AI (kg/kg) | 0.001 | 0.002 | 0.001 | 0.002 | 0.002 | 0.002 |
| Irrigation energy (MJ/kg) | 0 | 0.010 | 0 | 0 | 0.007 | 0.05 |
| Field activities energy (MJ/kg) | 0.458 | 0.472 | 0.476 | 1.791 | 1.209 | 1.21 |
| Post-harvest energy (kWh/kg) | 0.003 | 0.186 | 0.003 | 0.050 | 0.152 | 0.32 |
| Transportation (kg*km/kg) | 7.081 | 7.204 | 8.235 | 14.483 | 24.506 | 51.58 |
| Field-level N2O emissions (kg/kg) | 0.001 | 0.001 | 0.001 | 1.882E-4 | 0.002 | 0.002 |
| Field-level CO2 emissions (kg/kg) | 0.030 | 0.045 | 0.041 | 0.118 | 0.030 | 0.09 |
| Soil carbon change (kg CO2/kg) | -0.225 | -0.161 | -0.160 | 0.046 | 0.227 | 0.390 |

### Non-durum Wheat

Similar to rapeseed, Germany had the highest wheat grain yields (7360 kg/ha), followed closely by France (7090 kg/ha) (Table 2). Canada, the US and Saskatchewan had similar yields (3375, 3322, and 2986 kg/ha, respectively), and Australia had the lowest (2042 kg/ha). In addition to the grain yield, wheat also has straw as a co-product, ranging from 0.057-0.123 kg/kg). There were no lime inputs to Saskatchewan and Canadian wheat production systems. Seed inputs were fairly similar between Saskatchewan, Canada, France and Germany, ranging from 0.021-0.033 kg/kg. The US had slightly higher seed inputs (0.047 kg/kg), and Australia had the highest seed inputs (0.075 kg/kg). Australia and the US had the highest lime application rates (0.196 kg/kg and 0.124 kg/kg) due to their relatively low yields. France and Germany had 0.056 and 0.054 kg/kg lime application. N fertilizer application rates ranged from 0.037 kg/kg in Australia to 0.065 kg/kg in France. France and Germany had relatively low P fertilizer application rates (0.005-0.006 kg/kg) compared to all other regions (0.013-0.026 kg/kg). K and S fertilizer application rates were somewhat similar between regions with K rates ranging from 0.003 kg/kg in Australia to 0.006 kg/kg in Canada, France, and the US. S fertilizer application rates ranged from 0.001 kg/kg in France to 0.011 kg/kg in Saskatchewan. Saskatchewan wheat received no manure inputs. Pig manure application rates were the lowest in Australia (0.049 kg/kg), fairly similar in Canada, France, and the US (0.103-0.164 kg/kg), and highest in Germany (0.479 kg/kg). Poultry manure application rates were lowest in Canada and Australia (0.024-0.025 kg/kg), followed by France and Germany (0.042-0.046 kg/kg), with the highest application rates in the US (0.115 kg/kg). Pesticide application rates were similar between regions, ranging from 0.0002-0.001 kg/kg.

Irrigation was not performed in Saskatchewan. Where irrigation was performed, energy inputs were the lowest in Germany and the US (1.25x10-9-2.86x10-9 MJ/kg), followed by Canada and France (0.004 and 0.002 MJ/kg), and Australia had the highest (0.015 MJ/kg). Australia and the US had the highest energy use for field activities (1.240 and 1.290 MJ/kg), followed by Canada (0.758 MJ/kg), France and Germany (0.558 and 0.565 MJ/kg), and Saskatchewan had the lowest (0.330 MJ/kg). Australia, France, Germany and the US all had the same post-harvest energy use (0.530 MJ/kg), as did Canada and Saskatchewan (0.003 MJ/kg). Like rapeseed, all transportation distances were assumed to be 30 km for manure and 50 km for all other inputs. Germany and the US had the most inputs transported to farm (23.519 ad 20.899 kg*km/kg), followed by Australia and France (15.631 and 14.056 kg*km/kg), and Canada and Saskatchewan (6.286 and 8.895 kg*km/kg).

Australia had the lowest N2O emissions, due to their soil, climate, and management conditions (3.11x10-4 kg/kg). This was followed by the US (4.87x10-4 kg/kg), then Saskatchewan and Canada (6.07x10-4 and 6.57x10-4 kg/kg), and France and Germany had the highest emissions (7.98x10-4 and 7.91x10-4 kg/kg). Saskatchewan, Canada, France and Germany had similar field-level CO2 emissions (0.020-0.038 kg/kg) and the US and Australia had higher emissions (0.072 and 0.109 kg/kg). Saskatchewan and Canadian soils had net carbon sequestration (-0.078 to -0.153 kg CO2/kg). All other soils had net CO2 emissions, ranging from 0.031 kg/kg in Australia to 0.178 kg/kg in Germany.

Table 2. Life cycle inventory data for wheat production

|  | **Saskatchewan** | **Canada** | **Prairie Provinces** | **Australia** | **France** | **Germany** | **United States** |
| --- | --- | --- | --- | --- | --- | --- | --- |
| Yield (kg/ha) | 2986.2 | 3374.7 | 3371.865 | 2042 | 7090 | 7360 | 3222.0 |
| Straw removed (kg DM/kg) | 0.123 | 0.123 | 0.123 | 0.110 | 0.081 | 0.057 | 0.123 |
| Seed (kg/kg) | 0.032 | 0.033 | 0.033 | 0.075 | 0.022 | 0.021 | 0.047 |
| Lime (kg/kg) | 0 | 0 | 0 | 0.196 | 0.056 | 0.054 | 0.124 |
| N fertilizers (kg/kg) | 0.056 | 0.042 | 0.047 | 0.037 | 0.065 | 0.058 | 0.051 |
| P fertilizers (kg/kg) | 0.022 | 0.013 | 0.033 | 0.026 | 0.006 | 0.005 | 0.017 |
| K fertilizers (kg/kg) | 0.005 | 0.006 | 0.015 | 0.003 | 0.006 | 0.005 | 0.006 |
| S fertilizers (kg/kg) | 0.011 | 0.007 | 0.014 | 0.005 | 0.001 | 0.005 | 0.003 |
| Pig manure (kg/kg) | 0 | 0.103 | 0 | 0.049 | 0.151 | 0.479 | 0.164 |
| Poultry manure (kg/kg) | 0 | 0.024 | 0 | 0.025 | 0.046 | 0.042 | 0.115 |
| Total pesticide AI (kg/kg) | 0.001 | 0.001 | 0.001 | 0.001 | 2.13E-04 | 4.38E-04 | 2.60E-04 |
| Irrigation energy (MJ/kg) | 0 | 0.004 | 0 | 0.015 | 0.002 | 1.25E-09 | 2.86E-09 |
| Field activities energy (MJ/kg) | 0.330 | 0.758 | 0.312 | 1.240 | 0.558 | 0.565 | 1.290 |
| Post-harvest energy (kWh/kg) | 0.003 | 0.003 | 0.003 | 0.530 | 0.530 | 0.530 | 0.530 |
| Transportation (kg*km/kg) | 6.286 | 8.895 | 7.146 | 15.631 | 14.056 | 23.519 | 20.899 |
| Field-level N2O emissions (kg/kg) | 6.07E-04 | 6.57E-04 | 6.94E-04 | 3.11E-04 | 7.98E-04 | 7.91E-04 | 4.87E-04 |
| Field-level CO2 emissions (kg/kg) | 0.027 | 0.020 | 0.024 | 0.109 | 0.038 | 0.036 | 0.072 |
| Soil carbon change (kg CO2/kg) | -0.153 | -0.078 | -0.103 | 0.031 | 0.103 | 0.178 | 0.060 |

### Peas

France and Germany had the highest yields of peas (3346 and 3200 kg/ha), followed by Saskatchewan and Canada (2235 and 2325 kg/ha), and the US had the lowest yield (1950 kg/ha) (Table 3). Canada and the Prairie Provinces had the highest seed inputs (0.12 and 0.11 kg/kg), followed by the US (0.072 kg/kg), and France and Germany had the lowest (0.042 and 0.044 kg/kg). Due to a lack of data availability, all inoculant inputs were assumed to be the same as the Canadian application rates on a per hectare basis, therefore all variation was due to yield differences (0.001-0.002 kg/kg). There were no lime inputs to Saskatchewan and Canadian peas. France and Germany had similar lime application rates (0.12 and 0.125 kg/kg), and the US had a higher rate (0.205 kg/kg). French peas had no synthetic N fertilizer application, and all other regions had low application rates, ranging from 5.69x10-4 kg/kg in Canada to 1.88x10-2 kg/kg in Germany. All other synthetic fertilizer application rates were also fairly low. P fertilizer application rates ranged from 2.95x10-2 kg/kg in the Prairie Provinces to 7.19x10-2 in the US. K application rates ranged from 2.26x10-3 kg/kg in Saskatchewan to 6.32x10-2 in the US, and S application rates ranged from 0 kg/kg in France to 6.39x10-3 kg/kg in Canada. Manure was not applied in Saskatchewan or Canada. Pig manure application rates ranged from 0.272 kg/kg in the US to 1.101 kg/kg in Germany. Poultry manure application rates ranged from 0.097 kg/kg in France and Germany to 0.191 kg/kg in the US. Canada had the lowest application rate of total pesticide active ingredients (9.45x10-4 kg/kg), followed by Saskatchewan, France and Germany (0.0012-0.0016 kg/kg), and the US had the highest (0.002 kg/kg).

France and the US were the only countries that irrigated their peas, using 0.037 and 0.064 MJ/kg, respectively. France, Germany, and the US had higher field activities fuel use (0.965-1.179 MJ/kg) than Canada and Saskatchewan (0.503-0.564 MJ/kg). Based on average moisture contents at harvest, German peas do not need to be dried. Canada had the lowest post-harvest drying energy use (8.10x10-4 MJ/kg), followed by Saskatchewan and the US (0.001 MJ/kg), and France had the highest (0.041 MJ/kg). As with rapeseed and wheat, all transportation distances were assumed to be 30 km for manure inputs and 50 km for all other inputs. Since there was no manure application on Saskatchewan and Canadian peas, they had much lower transportation of inputs (6.61 and 8.01 kg*km/kg) compared to France (25.29 kg*km/kg), the US (35.83 kg*km/kg), and Germany (49.71 kg*km/kg).

Saskatchewan peas had the lowest N2O emissions (6.80x10-4 kg/kg), due to their climate, soil and management conditions. Canada and France had similar N2O emissions (7.38x10-4 and 7.39x10-4 kg/kg), followed by the US (9.19x10-4 kg/kg), and Germany had the highest emissions (1.30x10-3 kg/kg). Since there was no lime applied to Saskatchewan or Canadian peas, their field-level CO2 emissions were much lower (2.47x10-4-2.98x10-4 kg/kg), compared to France, Germany, and the US (5.25x10-2-9.80x10-2 kg/kg). Canadian and Saskatchewan soils were the only regions that had net carbon sequestration (-0.162 to -0.208 kg CO2/kg). All other regions had net CO2 emissions from soil carbon change, ranging from 0.099 kg/kg in the US to 0.410 kg/kg in Germany. The N credit from N fixation was fairly similar across all regions (-0.004 to -0.006 kg ammonia/kg).

Table 3. Life cycle inventory data for dry pea production

|  | **Saskatchewan** | **Canada** | **Prairie Provinces** | **France** | **Germany** | **United States** |
| --- | --- | --- | --- | --- | --- | --- |
| Yield (kg/ha) | 2235.14 | 2324.59 | 2369.581 | 3346 | 3200 | 1950.281 |
| Seed (kg/kg) | 0.09 | 0.12 | 0.11 | 0.042 | 0.044 | 0.072 |
| Inoculant (kg/kg) | 0.002 | 0.002 | 6.62E-06 | 0.001 | 0.001 | 0.002 |
| Lime (kg/kg) | 0 | 0 | 0 | 0.120 | 0.125 | 0.205 |
| N fertilizers (kg/kg) | 9.09E-04 | 5.80E-04 | 5.69E-04 | 0 | 1.88E-02 | 1.38E-02 |
| P fertilizers (kg/kg) | 3.18E-02 | 3.01E-02 | 2.95E-02 | 4.42E-02 | 3.52E-02 | 7.19E-02 |
| K fertilizers (kg/kg) | 2.26E-03 | 5.55E-03 | 5.44E-03 | 4.81E-02 | 5.02E-02 | 6.32E-02 |
| S fertilizers (kg/kg) | 3.43E-03 | 6.39E-03 | 6.27E-03 | 0 | 1.56E-03 | 1.33E-03 |
| Pig manure (kg/kg) | 0 | 0 | 0 | 0.320 | 1.101 | 0.272 |
| Poultry manure (kg/kg) | 0 | 0 | 0 | 0.097 | 0.097 | 0.191 |
| Total pesticide AI (kg/kg) | 1.22E-03 | 9.45E-04 | 9.27E-04 | 1.62E-03 | 1.43E-03 | 0.002 |
| Irrigation energy (MJ/kg) | 0 | 0 | 0 | 0.037 | 0 | 0.064 |
| Field activities energy (MJ/kg) | 0.503 | 0.564 | 0.553 | 0.965 | 1.058 | 1.179 |
| Post-harvest energy (kWh/kg) | 1.30E-03 | 8.10E-04 | 8.10E-04 | 0.041 | 0 | 0.001 |
| Transportation (kg*km/kg) | 6.61 | 8.01 | 7.86 | 25.29 | 49.71 | 35.83 |
| Field-level N2O emissions (kg/kg) | 6.80E-04 | 7.38E-04 | 6.37E-04 | 7.39E-04 | 1.30E-03 | 9.19E-04 |
| Field-level CO2 emissions (kg/kg) | 2.98E-04 | 2.47E-04 | 2.43E-04 | 5.26E-02 | 5.89E-02 | 9.80E-02 |
| Soil carbon change (kg CO2/kg) | -0.208 | -0.162 | -0.162 | 0.217 | 0.410 | 0.099 |
| N credit (kg ammonia/kg) | -0.004 | -0.005 | -0.005 | -0.006 | -0.005 | -0.006 |

## Life cycle impact assessment

Overall, Saskatchewan and Canadian rapeseed, wheat, and peas, have relatively low impacts compared to the same crops produced in other countries. Throughout all the results, including sensitivity analyses, either Saskatchewan or Canadian average crops had the lowest carbon footprint except for Australian rapeseed, which had lower impacts of production due to lower field-level N2O emissions. However, when using the low end of the possible N2O emission values in the sensitivity analysis, Saskatchewan rapeseed had lower impacts than Australian rapeseed. Changing the impact assessment method from GWP 100 to GWP 500 also changed the results so that Saskatchewan rapeseed had lower impacts than Australia. This was due to the reduction in the impact factor for N2O from the 100 to 500-year timeframe. Also, when the impacts of soil carbon changes were included in the carbon footprint totals, Saskatchewan and Canadian crops always had the lowest impacts since their soils have net carbon sequestration, and all other countries have net carbon losses.

In general, field-level N2O emissions, fertilizer production, field activities, and soil carbon changes were the largest contributors to the carbon footprints of crop production. The specific contributions for each crop-region model are detailed below.

### Rapeseed

Best practice is to present the LCIA results and the soil carbon change impacts separately. Therefore, Figure 1 shows the carbon footprint results, excluding soil carbon changes, for rapeseed production in Saskatchewan, Canada, Canadian Prairie Provinces, Australia, France and Germany, broken down by the contribution of each major LCI data category (detailed breakdown shown in Table 7). The results for the Canadian Prairie Provinces were not significantly different from the Canadian average. For Canada and Saskatchewan, the main contributors to the carbon footprint of rapeseed production were fertilizer inputs (27%), and associated N2O emissions (57-59%). For Saskatchewan, all N2O emissions came from a combination of N applied in synthetic fertilizer and from crop residues, with ~55% from fertilizer and 45% from residues. There is no manure application for Canadian rapeseed, and there are no net soil carbon losses on Saskatchewan soils that could lead to N losses. For the Canadian average, 0.01% of the N2O emissions came from mineralization N losses due to soil carbon change. The impacts of upstream fertilizer production were predominantly due to CO2 emissions in the upstream production of ammonia to produce N fertilizers. CO2 from the combustion of diesel for field activities contributed 6% of the impacts. Canadian average rapeseed production had 19% higher production than Saskatchewan, due to higher fertilizer inputs and associated N2O emissions.

For Australia, fertilizer inputs accounted for 26% of the carbon footprint but N2O emissions were only 11%. This is due to the very low N2O emission factors and lack of volatilization in Australia due to its dry climate and lack of irrigation for rapeseed. Approximately 64% of the N2O emissions were due to fertilizer application, 26% from crop residues and 10% from soil carbon change. There was no manure application for Australian rapeseed. Field activities accounted for 30% of Australian GHG emissions, which is much higher than the 5-6% for Canadian and Saskatchewan rapeseed. This is because Australian rapeseed requires higher levels of field activities, and because the overall impacts of production are lower, leading to the higher percent contribution from field activities. CO2 emissions from lime and urea application also accounted for 24% of emissions, compared to 5-6% for Canada and Saskatchewan. This is because lime fertilizer is applied in Australia and not in Canada. Overall, Australian rapeseed had a 19% lower carbon footprint than Saskatchewan rapeseed (not including SOC changes), due to the significantly lower N2O emissions. All differences between regions were statistically significant (as indicated by the separate letters above each bar on the graph).

French and German rapeseed production systems had quite similar impacts, with 24% of impacts coming from fertilizer inputs, and 55-58% coming from field-level N2O emissions. Fifty-one percent of N2O emissions from French rapeseed were from synthetic N fertilizer, 6% from manure, 22% from crop residues, and 20% from soil carbon change. For Germany, 34% of N2O emissions came from synthetic fertilizer, 8% from manure, 14% from crop residue and 44% from soil carbon loss. Field activities accounted for 10% of the impacts of both French and German rapeseed, and all other categories were <5%. French and German rapeseed production had 57% and 66% higher impacts than rapeseed production in Saskatchewan. These differences came from higher inputs of fertilizers and manure, and higher levels of field activities, despite the higher yields in Europe compared to Canada. There were also higher levels of N2O emissions due to a combination of the higher N inputs, as well as differences in soil, climate, and management conditions.

Canadian soils are the only cropland soils that are sequestering carbon, due to a combination of soil, climate and management factors (Figure 2). The soil carbon sequestration estimates for Saskatchewan are higher than the national and Prairie average, since there are some regions in Canada that do not sequester as much carbon, and some that have net CO2 emissions. All other countries have net CO2 emissions from their cropland soils. Germany has the highest levels of emissions, followed closely by France. This is due to the soil and climate conditions in these regions, as well as the intensity of field operations. Australia has much lower levels of CO2 emissions, likely due to differences in soil, climate and management factors. According to the Australian NIR (Commonwealth of Australia, 2022), the majority (~70%) of the estimate soil carbon losses from cropland are due to land converted to cropland, with the remainder from cropland remaining cropland. In the most recent Australian NIR, they indicated that croplands have a small net emission of carbon, however in previous years (2016 and 2018) they have had a small net sequestration. However, these inter-annual changes are small compared to the long-term trend of decreased carbon emissions (-95%) from Australian soils from 1990-2020, due to the adoption of no-till and reduced-till practices (Commonwealth of Australia, 2022).

Including the impacts of soil carbon changes, Saskatchewan rapeseed has the lowest life cycle GHG emissions of all regions studied (0.372 kg CO2e/kg). Australian and Canadian rapeseed have similar overall impacts, at ~ 42% and 47% higher than Saskatchewan. Prairie Province average rapeseed did not have significantly different results from Canadian average. Despite the lower impacts of production for Australian rapeseed compared to Saskatchewan and Canadian rapeseed, Australian agricultural soils have net CO2 emissions, whereas Saskatchewan and Canadian soils are sequestering carbon. French and German peas have much higher impacts (214% and 271% higher than Saskatchewan), since they have both higher impacts of production, and higher CO2 emissions from agricultural soils. Both including and excluding the soil carbon changes, Saskatchewan rapeseed has a lower carbon footprint (20-49% lower) than the weighted average of all countries included this analysis (Table 4).

Figure 1. Contribution analysis of main LCI data categories to the overall carbon footprints (without soil carbon change) of rapeseed produced in SK, CA, CA-PP, AU, FR and DE (kg CO2e per kg rapeseed).

Figure 2. Contribution analysis of main LCI data categories to the overall carbon footprints (with soil carbon change) of rapeseed produced in SK, CA, CA-PP, AU, FR and DE (kg CO2e per kg rapeseed). The dashed line represents net total emissions in SK, accounting for negative impacts from soil carbon changes.

Table 4. Global average carbon footprint values (with and without soil carbon change) compared to Saskatchewan carbon footprint values for rapeseed production.

|  | Global average | Saskatchewan |
| --- | --- | --- |
| kg CO2e per kg rapeseed (without soil carbon change) | 0.747 | 0.597 |
| kg CO2e per kg rapeseed (with soil carbon change) | 0.728 | 0.372 |

### Non-durum wheat

Figure 3 shows the LCIA results, without soil carbon change, for the production of 1 kg of non-durum wheat grain (allocated based on the mass relationship between grain and straw harvested) for Saskatchewan, Canada, Canadian Prairie Provinces, Australia, France, Germany, and the United States (detailed breakdown shown in Table 8). The results for the Canadian Prairie Provinces were not significantly different from the Canadian average. The results are broken down into the contributions from transportation, seed, fertilizer inputs, manure inputs, plant protection products, field activities, irrigation, post-harvest drying, and field-level CO2 and N2O emissions. For Canadian and Saskatchewan wheat, fertilizer inputs (22-31%) and associated field-level N2O emissions (47-51%) were the highest contributors to the life cycle GHG emissions. Around 65% of the N2O emissions came from synthetic N fertilizer, and 35% from crop residues. For the Canadian average, <1% came from N mineralization due to soil carbon losses, due to small regional soil carbon losses in the Eastern provinces as well as British Columbia. There were no carbon losses in Saskatchewan soils, therefore no N2O emissions from this source. Field activities contributed 7-15% of the GHG emissions of Saskatchewan and Canadian wheat grain, and field-level CO2 emissions from the application of urea contributed 5-7%. All other inputs and activities contributed 5% or less. Overall, the Canadian average wheat production had 5% higher impacts than Saskatchewan. All other countries had significantly higher impacts of production than Saskatchewan.

Australian wheat had 57% higher impacts than Saskatchewan wheat. The impacts of seed production were much higher in Australia than any other region (21%). This is due to the assumed land use change in Australia for the production of wheat seed, as included in Nemecek (2015). Australian peas also had higher levels of field activities than Canada and Saskatchewan, which contributed a similar proportion (17%), but were actually double the Canadian levels of energy use. Fertilizer inputs, post-harvest energy use, and field-level CO2 and N2O emissions all had similar percentage contributions to the overall impacts of Australian wheat (10-18%). Seventy-nine percent of the N2O emissions for Australian wheat were due to synthetic N fertilizer application. Nine percent were from N mineralization due to soil carbon losses, 7% from crop residues, and 4% from manure inputs. All other inputs and activities contributed 1% or less to the overall carbon footprint of Australian wheat production.

French and German wheat had very similar impacts, which were 33-38% higher than Saskatchewan wheat. This was due mostly to higher field-level N2O emissions, as well as higher post-harvest energy use. Field-level N2O emissions were the highest contributor to the overall impacts, contributing 47-48%. Fifty percent of French N2O emissions came from synthetic fertilizer application, 21% from soil carbon losses, 23% from crop residues and 6% from manure inputs. For German N2O emissions, the breakdown was 47% from soil carbon losses, 32% from fertilizer inputs, 8% from manure and 13% from crop residues. Fertilizer production contributed 18% of the impacts of French and German wheat production, post-harvest energy use contributed 13-15%, and field activities 9%. Field-level CO2 emissions from lime and urea application contributed 7% of impacts, and all other inputs and activities contributed 2% or less.

Wheat production in the US had 51% higher impacts than Saskatchewan. This is due to higher levels of field activities, post-harvest energy use, and field-level CO2 emissions. Fertilizer production (22%) and field-level N2O emissions (27%) were the largest contributors to the carbon footprint of US wheat. Forty-five percent of field-level N2O emissions for US wheat came from the application of synthetic N fertilizers, 34% came from crop residues, 11% from soil carbon loses, and 9% from manure. Field activities contributed 18% of the life cycle GHG emissions of US wheat production, field-level CO2 emissions from lime and urea contributed 13%, and post-harvest energy use contributed 11%. All other impacts and activities contributed 6% or less.

Saskatchewan soils had the highest levels of carbon sequestration per kg of wheat (Figure 4). Average Canadian soils are also sequestering carbon, albeit at a lower rate. All other regions have net carbon emissions from agricultural soils. Australia has the lowest levels of emissions, followed by the US, France, and Germany. When the impacts of soil carbon changes are included in the overall carbon footprint, Saskatchewan wheat production has the lowest impacts (0.214 kg CO2e/kg), followed by Canadian wheat (41% higher), and Prairie Province wheat was not significantly different from the Canadian average. All other regions have much higher impacts than Saskatchewan, since they have higher life cycle impacts of production, and have net carbon emissions from soils. Of all other regions, Australian and France have the lowest impacts (176% of Saskatchewan impacts), followed by the United States (180%). German wheat has the highest combined impacts (203% of Saskatchewan). Either including or excluding soil carbon changes, Saskatchewan wheat grain production had lower impacts (28-61% lower) than the global production weighted average of all countries (Table 5).

Figure 3. Contribution analysis of main LCI data categories to the overall carbon footprints (without soil carbon change) of wheat grain produced in SK, CA, CA-PP, AU, FR, DE, and US (kg CO2e per kg wheat grain), using mass allocation between harvested grain and straw.

Figure 4. Contribution analysis of main LCI data categories to the overall carbon footprints (with soil carbon changes) of wheat grain produced in SK, CA, CA-PP, AU, FR, DE, and US (kg CO2e per kg wheat grain), using mass allocation between harvested grain and straw. The dashed line represents net total emissions in SK, accounting for negative impacts from soil carbon changes.

Table 5. Global average carbon footprint values (with and without soil carbon change) compared to Saskatchewan carbon footprint values for wheat grain production.

|  | Global average | Saskatchewan |
| --- | --- | --- |
| kg CO2e per kg wheat grain (without soil carbon change) | 0.497 | 0.359 |
| kg CO2e per kg wheat grain (with soil carbon change) | 0.552 | 0.214 |

### Peas

Figure 5 shows the LCIA results, without soil carbon change, for the production of 1 kg of peas for Saskatchewan, Canada, Canadian Prairie Provinces, France, Germany, and the United States (detailed breakdown shown in Table 9). The results are broken down into the contributions from transportation, seed, fertilizer inputs, manure inputs, inoculant inputs, plant protection products, field activities, irrigation, post-harvest drying, field-level CO2 and N2O emissions, and N credit. The results for the Canadian Prairie Provinces were not significantly different from the Canadian average. All other differences between regions are significantly different. Peas produced in Saskatchewan have the lowest carbon footprint, followed closely by the Canadian average (7% higher). The highest contributor to the carbon footprint of Saskatchewan and Canadian pea production is field-level N2O emissions (67-69%). Approximately 95% of the N2O emissions are due to crop residue N inputs, and 5% from fertilizer N inputs, due to the high levels of crop residues and low synthetic fertilizer and manure application rates for peas. Field activities contributed 15-16% of the life cycle impacts for Canadian and Saskatchewan peas, and fertilizer production contributed 12%. The N credit, for reduced N fertilizer required for the next crop in rotation, contributed a 4% reduction in impacts. All other inputs and activities contributed 5% or less.

French peas had 54% higher impacts than Saskatchewan peas, due to higher inputs of fertilizer and manure, higher levels of field activities, and higher field-level CO2 emissions due to the inclusion of lime application. Field-level N2O emissions are the highest contributor to the carbon footprint of French pea production (48%). Fifty-five percent of these N2O emissions are due to N mineralization from soil carbon loss. Twenty-nine percent are from crop residues, and 16% are from manure inputs. There were no synthetic N fertilizers applied to French peas. After N2O emissions, field activities are the next highest contributor to the carbon footprint of French peas (18%). Fertilizer inputs and field-level CO2 emissions from lime inputs contributed 12% each, and all other inputs and activities contributed 3% or less. The N credit contributed -3%.

German peas had the highest carbon footprint of all regions (131% of Saskatchewan peas). This was due to higher field-level N2O emissions, as well as higher fertilizer inputs. Field-level N2O emissions contributed 56% of the life cycle GHG emissions. Seventy-one percent of these emissions came from soil carbon losses, 13% from manure, 9% from crop residues and 7% from synthetic N fertilizer. Fertilizer production, and field activities each contributed 13% to the carbon footprint of German peas, and field-level CO2 emissions from lime and urea application contributed 9%. All other inputs contributed 4% or less.

Pea production in the US had the second highest carbon footprint (after Germany), which was 114% of the Saskatchewan pea carbon footprint. This was due to high levels of field activities and field-level CO2 emissions, and relatively high field-level N2O emissions (but lower than Germany). Field-level N2O emissions were the highest contributors to the carbon footprint of US peas (43%). These emissions came from crop residues (69%), soil carbon losses (12%), synthetic N fertilizer (10%), and manure (10%). Fertilizer production and field-level CO2 emissions from lime and urea application each contributed 17% to the overall carbon footprint of US pea production. Field activities contributed 16%, and all other inputs and activities contributed 3% or less.

Saskatchewan soils had the highest levels of soil carbon sequestration, followed by the Canadian and Prairie average (Figure 6). All other countries had net carbon emissions from their agricultural soils. The US had the lowest levels of carbon emissions, followed by France, and Germany had the highest. When the impacts of soil carbon changes are combined with the LCIA results, Saskatchewan peas still have the lowest carbon footprint (0.07 kg CO2e/kg), followed by the Canadian average (98% higher). The Prairie average was not significantly different from the Canadian average. Since all other regions already had higher impacts of production, and have much higher impacts from soil carbon change, their combined impacts compared to Saskatchewan range from 861% higher in France to 1472% higher in Germany. When either including or excluding soil carbon changes, Saskatchewan peas had a lower carbon footprint (25-79% lower) than the global weighted average (Table 6).

Figure 5. Contribution analysis of main LCI data categories to the overall carbon footprints (without soil carbon changes) of peas produced in SK, CA, CA-PP, FR, DE, and US (kg CO2e per kg peas).

Figure 6. Contribution analysis of main LCI data categories to the overall carbon footprints (with soil carbon changes) of peas produced in SK, CA, CA-PP, FR, DE, and US (kg CO2e per kg peas). The dashed line represents net total emissions in SK, accounting for negative impacts from soil carbon changes.

Table 6. Global average carbon footprint values (with and without soil carbon change) compared to Saskatchewan carbon footprint values for pea production.

|  | Global average | Saskatchewan |
| --- | --- | --- |
| kg CO2e per kg peas (without soil carbon change) | 0.367 | 0.275 |
| kg CO2e per kg peas (with soil carbon change) | 0.314 | 0.067 |

Table 7. Detailed contribution analysis describing contributions to total GHG emissions (kg CO2e) per kilogram of rapeseed produced in the baseline model.

| Region | Transportation | Seed | Fertilizer inputs | Manure inputs | Plant protection | Field activities | Irrigation | Post-harvest | Field-level CO2 | Field-level N2O | Soil carbon change |
| --- | --- | --- | --- | --- | --- | --- | --- | --- | --- | --- | --- |
| SK | 0.002 | 0.005 | 0.159 | 0.000 | 0.007 | 0.037 | 0.000 | 0.002 | 0.030 | 0.355 | -0.225 |
| CA | 0.002 | 0.006 | 0.191 | 0.000 | 0.013 | 0.038 | 0.001 | 0.012 | 0.045 | 0.402 | -0.161 |
| CA-PP | 0.002 | 0.006 | 0.186 | 0.000 | 0.007 | 0.038 | 0.001 | 0.002 | 0.041 | 0.273 | -0.160 |
| AU | 0.003 | 0.004 | 0.126 | 0.000 | 0.023 | 0.145 | 0.000 | 0.013 | 0.118 | 0.051 | 0.046 |
| FR | 0.005 | 0.001 | 0.226 | 0.013 | 0.015 | 0.098 | 0.000 | 0.003 | 0.030 | 0.547 | 0.227 |
| DE | 0.011 | 0.002 | 0.240 | 0.023 | 0.015 | 0.098 | 0.008 | 0.009 | 0.043 | 0.543 | 0.390 |

Table 8. Detailed contribution analysis describing contributions to total GHG emissions (kg CO2e) per kilogram of wheat grain produced in the baseline model.

| Region | Transportation | Seed | Fertilizer inputs | Manure inputs | Plant protection | Field activities | Irrigation | Post-harvest | Field-level CO2 | Field-level N2O | Soil carbon change |
| --- | --- | --- | --- | --- | --- | --- | --- | --- | --- | --- | --- |
| SK | 0.001 | 0.018 | 0.111 | 0.000 | 0.006 | 0.025 | 0.000 | 0.002 | 0.026 | 0.169 | -0.145 |
| CA | 0.002 | 0.019 | 0.081 | 0.002 | 0.000 | 0.058 | 0.000 | 0.000 | 0.019 | 0.194 | -0.074 |
| CA-PP | 0.001 | 0.019 | 0.111 | 0.000 | 0.005 | 0.024 | 0.000 | 0.000 | 0.023 | 0.180 | -0.098 |
| AU | 0.003 | 0.120 | 0.087 | 0.004 | 0.005 | 0.095 | 0.002 | 0.058 | 0.104 | 0.083 | 0.029 |
| FR | 0.003 | 0.010 | 0.087 | 0.006 | 0.002 | 0.043 | 0.000 | 0.073 | 0.036 | 0.234 | 0.098 |
| DE | 0.005 | 0.009 | 0.084 | 0.010 | 0.003 | 0.044 | 0.000 | 0.060 | 0.035 | 0.227 | 0.171 |
| US | 0.004 | 0.032 | 0.118 | 0.010 | 0.002 | 0.099 | 0.000 | 0.062 | 0.068 | 0.147 | 0.057 |

Table 9. Detailed contribution analysis describing contributions to total GHG emissions (kg CO2e) per kilogram of peas produced in the baseline model.

| Region | Transportation | Seed | Fertilizer inputs | Manure inputs | Inoculant inputs | Plant protection | Field activities | Irrigation | Post-harvest | Field-level CO2 | Field-level N2O | N credit | Soil carbon |
| --- | --- | --- | --- | --- | --- | --- | --- | --- | --- | --- | --- | --- | --- |
| SK | 0.001 | 0.012 | 0.032 | 0.000 | 0.001 | 0.011 | 0.041 | 0.00 | 0.001 | 3.00E-04 | 0.186 | -0.010 | -0.208 |
| CA | 0.002 | 0.012 | 0.034 | 0.000 | 0.001 | 0.009 | 0.046 | 0.00 | 1.70E-04 | 2.50E-04 | 0.202 | -0.011 | -0.162 |
| CA-PP | 0.002 | 0.011 | 0.033 | 0.000 | 0.001 | 0.009 | 0.045 | 0.00 | 1.70E-04 | 2.40E-04 | 0.174 | -0.011 | -0.162 |
| FR | 0.005 | 0.014 | 0.051 | 0.012 | 0.001 | 0.012 | 0.078 | 1.91E-03 | 0.006 | 0.05 | 0.202 | -0.013 | 0.217 |
| DE | 0.011 | 0.021 | 0.082 | 0.025 | 0.001 | 0.011 | 0.086 | 0.00 | 0.00 | 0.06 | 0.354 | -0.013 | 0.410 |
| US | 0.008 | 0.008 | 0.098 | 0.018 | 0.001 | 0.017 | 0.096 | 7.36E-03 | 4.10E-04 | 0.10 | 0.251 | -0.016 | 0.099 |
