# Supplementary material for: Carbon footprints of commodity field crops in global markets
Source: Research Square preprint supplement (doi:10.21203/rs.3.rs-3359627/v1), 2023-11-16
Supplement: Supplementary file 3 [file 6aa67a925fecc2ab3c96b0e3.xlsx]

## Sheet: Table of contents
Sheet number	Sheet name	Description
1	Table of contents	Table of contents
2	Default pedigree matrix	Default pedigree matrix, as defined in Ciroth et al. 2016
3	Yield temporal pedigree	Alterations made to pedigree matrix for addressing temporal correlation of yield data
4	Completeness pedigree	Alterations made to pedigree matriz for addressing completeness in terms of percentage of supply covered
5	Reliability pedigree	Alterations made to pedigree matrix for addressing reliability of modelled data and single farm measures
6	Summary sheet - SK	Summary of data sources and associated uncertainty for each LCI data point for Saskatchewan
7	Summary sheet - CA	Summary of data sources and associated uncertainty for each LCI data point for Canada
8	Summary sheet - FR	Summary of data sources and associated uncertainty for each LCI data point for France
9	Summary sheet - DE	Summary of data sources and associated uncertainty for each LCI data point for Germany
10	Summary sheet - US	Summary of data sources and associated uncertainty for each LCI data point for the US
11	Dried peas, Canada – Bamber et al. 2020	Canadian dried pea data from Bamber et al. 2020
12	Dried peas, CA - van Paassen et al. 2019	Canadian dried pea data from van Paassen et al. 2019
13	Dried peas, CA - CRSC	Canadian and Saskatchewan canola data from the Canadian Roundtable on Sustainable Crops report by (S&T)2 Consultants "Updated Carbon Footprint for Dried Peas"
14	CA - Statscan	Statistics Canada table 32-10-059-01, Canada data
15	SK - Statscan	Statistics Canada table 32-10-059-01, Saskatchewan data
16	Dried peas, SK - Bamber et al. 2020	Saskatchewan dried pea data from Bamber et al. 2020
17	MacWilliam et al. 2014 - CA pea	MacWilliam et al. 2014 "Life cycle and economic assessment of Western Canadian pulse systems: The inclusion of pulses in crop rotations"
18	Dried peas, FR - van Paassen et al. 2019	French dried pea data from van Paassen et al. 2019
19	Dried peas, France – Nemecek 2007	French dried pea data from Nemecek 2007
20	FR - Eurostat database	Eurostat database, French pea production
21	Peas, FR - Naudin et al. 2014	Naudin et al. 2014 "Life cycle assessment applied to pea-wheat intercrops: A new method for handling the impacts of co-products"
22	Peas, FR - Mosnier et al. 2011	Mosnier et al. 2011 "Evaluation of the environmental implications of the incorporation of feed-use amino acids in the manufacturing of pig and broiler feeds using Life Cycle Assessment"
23	Nguyen et al. 2012 FR peas	Nguyen et al. 2012 "Using environmental constraints to formulate low-impact poultry feed"
24	Dried peas, DE - van Paassen et al. 2019	German dried pea data from van Paassen et al. 2019
25	Dried peas, DE - Nemecek 2007	German dried pea data from Nemecek 2007
26	DE - Eurostat database	Eurostat database, German pea production
27	Peas, GER - Dekker et al 2013	Dekker et al. 2013 "Effect of origin and composition of diet on ecological impact of the organic egg production chain"
28	Peas, GER - Saget et al. 2021	Saget et al. 2021 "Substitution of beef with pea protein reduces the environmental footprint of meat balls whilst supporting health and climate stabilisation goals"
29	Dried peas, US - van Paassen et al. 2019	US dried pea data from van Paassen et al. 2019
30	US - Census of Ag 2017	United States Cenus of Agriculture, 2017
31	US - USDA NASS database	National Agricultural Statistics Service, online database
32	Peas, US - Bandekar et al. 2022	Bandekar et al. 2022 "Cradle-to-grave life cycle assessment of production and consumption of pulses in the United States"

## Sheet: Default pedigree matrix
Return to Table of contents			Return to Table of contents
Default pedigree matrix, as defined in Ciroth et al. 2016
Reliability	Completeness	Temporal correlation	Geographical correlation	Further technological correlation	Quality Score
Verified data based on measurements	Representative data from all sites relevant for the market considered, over and adequate period to even out normal fluctuations	Less than 3 years of difference to the time period of the data set	Data from area under study	Data from enterprises, processes and materials under study	1
Verified data partly based on assumptions or non-verified data based on measurements	Representative data from > 50% of the sites relevant for the market considered, over an adequate period to even out normal fluctuations	Less than 6 years of difference to the time period of the data set	Average data from larger area in which the area under study is included	Data from processes and materials under study (i.e. identical technology) but from different enterprises	2
Non-verified data partly based on qualified estimates	Representative data from only some sites (<< 50%) relevant for the market considered or > 50% of sites but from shorter periods	Less than 10 years of difference to the time period of the data set	Data from area with similar production conditions	Data from processes and materials under study but from different technology	3
Qualified estimate (e.g. by industrial expert)	Representative data from only one site relevant for the market considered or some sites but from shorter periods	Less than 15 years of difference to the time period of the data set	Data from area with slightly similar production conditions	Data on related processes or materials	4
Non-qualified estimates	Representativeness unknown or data from a small number of sites and from shorter periods	Age of data unknown or more than 15 years of difference to the time period of the data set	Data from unknown or distinctly different area (North America instead of Middle East, OECD-Europe instead of Russia)	Data on related processes on laboratory scale or from different technology	5

## Sheet: Yield temporal pedigree
Return to Table of contents
Alterations made to pedigree matrix for addressing temporal correlation of yield data
Temporal correlation	Quality Score
5+ year average with last year less than three years prior	1
3 year average with last year less than three years prior OR 5+ year average with last year 3-6 years prior	2
3 year average with last year 3-6 years prior OR 5+ year average more than 6 years prior	3
1 year value less than 6 years prior OR 3+ year average more than 6 years prior	4
1 year value more than 6 years prior	5

## Sheet: Completeness pedigree
Return to Table of contents
Alterations made to pedigree matriz for addressing completeness in terms of percentage of supply covered
Completeness	Quality Score
Representative data from all sites relevant for the market considered, over and adequate period to even out normal fluctuations	1
Representative data from > 50% of the sites relevant for the market considered, over an adequate period to even out normal fluctuations	2
Representative data from only some sites (<< 50%) relevant for the market considered or > 50% of sites but from shorter periods, or representativeness of data unreported	3
Representative data from only one site relevant for the market considered or some sites but from shorter periods, or data derived from recommended practices (i.e., crop growing manuals, etc.)	4
Representative data from a small number of sites and from shorter periods	5

## Sheet: Reliability pedigree
Return to Table of contents
Alterations made to pedigree matrix for addressing reliability of modelled data and single farm measures
Reliability – Score definition	Score
Verified data based on measurements from a large number of sites, such as survey data OR nationally-resolved emissions models, such as IPCC Tier 2	1
Verified data partly based on assumptions or non-verified data based on measurements OR generic emissions models, such as IPCC Tier 1	2
Non-verified data partly based on qualified estimates	3
Qualified estimate (e.g. by industrial expert) OR measured inputs and emissions from a single or small number of field or experimental sites (i.e., <10)	4
Non-qualified estimates	5

## Sheet: Summary sheet - SK
Return to table of contents
Summary sheet of data points from all sources, and their associated total uncertainties from pedigree matrix entries to be used for choosing which data to be used for modeling farm inputs
	Green fill represents the data point with the lowest total uncertainty value
	Grey fill indicates a specific data point was not included by a specific source
	Yield	Land use			Seed	Nutrient inputs and soil amendments																					Pesticides												Irrigation - Energy use	Field activities				Transport	Post harvest energy use	Emissions
Source	Yield	Land use - seeded area	Land use - harvested area	Land use - Transformation	Seed	Innoculant	Lime	Manure - amount	Manure - Percent of crops receiving manure	Manure - amount applied to percent of crops receiving manure	Manure - type	N - fertilizer Amounts	N - Nutrient inputs	N - fertilizer types and distribution	P fertilizer - amounts	P - nutrient inputs	P fertilizer - types and distribution	K fertilizer - amounts	K - nutrient inputs	K fertilizer - types and distribution	S fertilizer - amounts	S - nutrient inputs	S fertilizer - types and distribution	Other nutrients and soil amendments - amounts	Other nutrients - inputs	Other nutrients and soil amendments - types and distribution	Herbicides - Amounts of each type	Herbicide - active ingredient amounts (total, not type)	Herbicides - Types and distribution	Insecticides - Amounts of each type	Insecticide - active ingredient amounts (total, not type)	Insecticides - types and distribution	Fungicides - Amounts of each type	Fungicide - active ingredient amounts (total, not type)	Fungicides - types and distribution	Other plant protection compounds - Amounts of each type	Other plant protection - active ingredient amounts (total, not type)	Other plant protection compounds - types and distribution	Irrigation - Energy use	Field activities energy use - total energy use	Field activities - activity data fuel use	Field activities - activity data	CO2 emissions from combustion of fuel	Transport	Post harvest energy use	Direct N2O emissions	Indirect N2O emissions	CO2 emissions from lime and urea	Soil carbon changes
StatsCan	1.02	1.02	1.02
ecoinvent	1.11301		1.05	1.20772	1.05	1.07144						1.05		1.05	1.05		1.05	1.05		1.05	1.05		1.05	1.05		1.05		1.05	1.05		1.05	1.05		1.05	1.05					1.05	1.05				1.05	1.05	1.05	1.07144
CRSC	1.0284				1.22959							1.22959		1.22959	1.22959		1.22959	1.22959		1.22959	1.22959		1.22959					1.05407	1.05407		1.05407	1.05407		1.05407	1.05407					1.21524				2.33679	2.33679	1.05407	1.05407		1.5
Calculation of emissions according to known best practices																																														1.05	1.05		1.5
Minimum uncertainty value	1.02	1.02	1.02	1.20772	1.05	1.07144	0	0	0	0	0	1.05	0	1.05	1.05	0	1.05	1.05	0	1.05	1.05	0	1.05	1.05	0	1.05	0	1.05	1.05	0	1.05	1.05	0	1.05	1.05	0	0	0	0	1.05	1.05	0	0	2.33679	1.05	1.05	1.05	1.07144	1.5
Calculation of emissions according to known best practices, for comparison against data quality for reported emissions calculations
Data category	Flow	Amount	Units	Data source (reliability)	Percent of supply covered	Time	Location	Technology details	Reliability	Completeness	Temporal Correlation	Geographical Correlation	Technological Correlation	R	C	Temp	G	Tech	Geometric Standard deviation		Additional uncertainty factors, as defined by Ciroth et al 2016
Emissions	Direct N2O emissions			IPCC Tier 2	Dependent on the percentage of supply covered by the input data to the model	Dependent on the temporal coverage of the input data to the model	Country-specific	Representative	1	3	1	1	1	1	1.05	1	1	1	1.05		Score	R	C	Temp	G	Tech
	Indirect N2O emissions			IPCC Tier 2	Dependent on the percentage of supply covered by the input data to the model	Dependent on the temporal coverage of the input data to the model	Country-specific	Representative	1	3	1	1	1	1	1.05	1	1	1	1.05		1	1	1	1	1	1
	CO2 emissions from lime and urea			IPCC Tier 1	Dependent on the percentage of supply covered by the input data to the model	Dependent on the temporal coverage of the input data to the model	Generic EF used	Representative	2	0	0	2	1	1.05	no	no	1.01	1	#VALUE!		2	1.05	1.02	1.02	1.01	1.05
	Soil carbon changes			IPCC Tirer 2	100	NIR validity	Country-specific	Representative	1	1	1	1	4	1	1	1	1	1.5	1.5		3	1.1	1.05	1.1	1.02	1.2
																					4	1.2	1.1	1.2	1.05	1.5
	Direct N2O emissions		Indirect N2O emissions		CO2 emissions from lime and urea																5	1.5	1.2	1.5	1.1	2
	Completeness	Temporal	Completeness	Temporal	Completeness	Temporal
ecoinvent	3	1	3	1	no	no
CRSC	4	2	4	2	no	no

## Sheet: Summary sheet - CA
Return to table of contents
Summary sheet of data points from all sources, and their associated total uncertainties from pedigree matrix entries to be used for choosing which data to be used for modeling farm inputs
	Green fill represents the data point with the lowest total uncertainty value
	Grey fill indicates a specific data point was not included by a specific source
	Yield	Land use			Seed	Nutrient inputs and soil amendments																					Pesticides												Irrigation - Energy use	Field activities				Transport	Post harvest energy use	Emissions
Source	Yield	Land use - seeded area	Land use - harvested area	Land use - Transformation	Seed	Innoculant	Lime	Manure - amount	Manure - Percent of crops receiving manure	Manure - amount applied to percent of crops receiving manure	Manure - type	N - fertilizer Amounts	N - Nutrient inputs	N - fertilizer types and distribution	P fertilizer - amounts	P - nutrient inputs	P fertilizer - types and distribution	K fertilizer - amounts	K - nutrient inputs	K fertilizer - types and distribution	S fertilizer - amounts	S - nutrient inputs	S fertilizer - types and distribution	Other nutrients and soil amendments - amounts	Other nutrients - inputs	Other nutrients and soil amendments - types and distribution	Herbicides - Amounts of each type	Herbicide - active ingredient amounts (total, not type)	Herbicides - Types and distribution	Insecticides - Amounts of each type	Insecticide - active ingredient amounts (total, not type)	Insecticides - types and distribution	Fungicides - Amounts of each type	Fungicide - active ingredient amounts (total, not type)	Fungicides - types and distribution	Other plant protection compounds - Amounts of each type	Other plant protection - active ingredient amounts (total, not type)	Other plant protection compounds - types and distribution	Irrigation - Energy use	Field activities energy use - total energy use	Field activities - activity data fuel use	Field activities - activity data	CO2 emissions from combustion of fuel	Transport	Post harvest energy use	Direct N2O emissions	Indirect N2O emissions	CO2 emissions from lime and urea	Soil carbon changes
ecoinvent	1.11301		1.05	1.20772	1.05	1.23545						1.05		1.05	1.05		1.05	1.05		1.05	1.05		1.05	1.05		1.05	1.05		1.05	1.05		1.05	1.05		1.05						1.05	1.05			1.05	1.05	1.05	1.0722	1.0722
van Paassen et al. 2019	1.05407		1.07442	1.07442	1.11301		1.11301	1.05407			1.05407				1.50439		1.50439		1.50439			1.50439					1.05407		1.05407	1.05407		1.05407	1.05407		1.05407				1.07442	1.07442				1.21524		1.07516	1.07516	1.07516
CRSC	1.0284				1.22959								1.22959	1.05		1.22959	1.05		1.22959	1.05		1.22959	1.05					1.05407	1.5053		1.05407	1.5053		1.05407	1.5053				1.20772	1.21524				2.33679	2.33679	1.05407	1.05407		1.5
Statscan	1.02	1.02	1.02
Macwilliam et al. 2014	1.61689				1.61689							1.61689		1.61689	1.82522		1.82522				1.82522		1.82522																							1.61689	1.61706
Calculation of emissions according to known best practices																																														1.05	1.05	1.12534	1.5
Minimum uncertainty value	1.02	1.02	1.02	1.07442	1.05	1.23545	1.11301	1.05407	0	0	1.05407	1.05	1.22959	1.05	1.05	1.22959	1.05	1.05	1.22959	1.05	1.05	1.22959	1.05	1.05	0	1.05	1.05	1.05407	1.05	1.05	1.05407	1.05	1.05	1.05407	1.05	0	0	0	1.07442	1.07442	1.05	1.05	0	1.21524	1.05	1.05	1.05	1.0722	1.0722
Calculation of emissions according to known best practices, for comparison against data quality for reported emissions calculations
Data category	Flow	Amount	Units	Data source (reliability)	Percent of supply covered	Time	Location	Technology details	Reliability	Completeness	Temporal Correlation	Geographical Correlation	Technological Correlation	R	C	Temp	G	Tech	Geometric Standard deviation		Additional uncertainty factors, as defined by Ciroth et al 2016
Emissions	Direct N2O emissions			IPCC Tier 2	Dependent on the percentage of supply covered by the input data to the model	Dependent on the temporal coverage of the input data to the model	Country-specific	Representative	1	3	1	1	1	1	1.05	1	1	1	1.05		Score	R	C	Temp	G	Tech
	Indirect N2O emissions			IPCC Tier 2	Dependent on the percentage of supply covered by the input data to the model	Dependent on the temporal coverage of the input data to the model	Country-specific	Representative	1	3	1	1	1	1	1.05	1	1	1	1.05		1	1	1	1	1	1
	CO2 emissions from lime and urea			IPCC Tier 1	Dependent on the percentage of supply covered by the input data to the model	Dependent on the temporal coverage of the input data to the model	Generic EF used	Representative	2	3	3	2	1	1.05	1.05	1.1	1.01	1	1.12534		2	1.05	1.02	1.02	1.01	1.05
	Soil carbon changes			IPCC Tirer 2	100	NIR validity	Country-specific	Representative	1	1	1	1	4	1	1	1	1	1.5	1.5		3	1.1	1.05	1.1	1.02	1.2
																					4	1.2	1.1	1.2	1.05	1.5
	Direct N2O emissions		Indirect N2O emissions		CO2 emissions from lime and urea																5	1.5	1.2	1.5	1.1	2
	Completeness	Temporal	Completeness	Temporal	Completeness	Temporal
ecoinvent	3	1	3	1	no	no
van Paassen et al. 2019	3	2	3	3	3	3
CRSC	4	2	4	2	no	no
Macwilliam et al. 2014	5	5	5	5	no	no

## Sheet: Summary sheet - FR
Return to table of contents
Summary sheet of data points from all sources, and their associated total uncertainties from pedigree matrix entries to be used for choosing which data to be used for modeling farm inputs
	Green fill represents the data point with the lowest total uncertainty value
	Grey fill indicates a specific data point was not included by a specific source
	Yield	Land use			Seed	Nutrient inputs and soil amendments																					Pesticides												Irrigation - Energy use	Field activities				Transport	Post harvest energy use	Emissions
Source	Yield	Land use - seeded area	Land use - harvested area	Land use - Transformation	Seed	Innoculant	Lime	Manure - amount	Manure - Percent of crops receiving manure	Manure - amount applied to percent of crops receiving manure	Manure - type	N - fertilizer Amounts	N - Nutrient inputs	N - fertilizer types and distribution	P fertilizer - amounts	P - nutrient inputs	P fertilizer - types and distribution	K fertilizer - amounts	K - nutrient inputs	K fertilizer - types and distribution	S fertilizer - amounts	S - nutrient inputs	S fertilizer - types and distribution	Other nutrients and soil amendments - amounts	Other nutrients - inputs	Other nutrients and soil amendments - types and distribution	Herbicides - Amounts of each type	Herbicide - active ingredient amounts (total, not type)	Herbicides - Types and distribution	Insecticides - Amounts of each type	Insecticide - active ingredient amounts (total, not type)	Insecticides - types and distribution	Fungicides - Amounts of each type	Fungicide - active ingredient amounts (total, not type)	Fungicides - types and distribution	Other plant protection compounds - Amounts of each type	Other plant protection - active ingredient amounts (total, not type)	Other plant protection compounds - types and distribution	Irrigation - Energy use	Field activities energy use - total energy use	Field activities - activity data fuel use	Field activities - activity data	CO2 emissions from combustion of fuel	Transport	Post harvest energy use	Direct N2O emissions	Indirect N2O emissions	CO2 emissions from lime and urea	Soil carbon changes
van Paassen et al. 2019	1.05407		1.07442	1.07442	1.11301		1.12487	1.05407			1.05407					1.05	1.05		1.05	1.05		1.05	1.05					1.05407			1.05407			1.05407					1.07442	1.07442				1.21524		1.07516	1.07516	1.07516
ecoinvent	1.11301		1.12487	1.12487	1.30007		1.30007									1.30007	1.30007		1.30007	1.30007							1.30007			1.30007			1.30007								1.30007	1.30007		1.30007	1.21646	1.20772	1.20772	1.21555
Eurostat	1	1	1
Naudin et al 2014	1.61689				1.37134											1.31639	1.31639		1.31639	1.31639								1.31639			1.31639			1.31639						1.31639						1.21555
Mosnier et al. 2011	1.20772				1.50439			1.50439					1.50439			1.50439	1.50439		1.50439	1.50439								1.50439			1.50439			1.50439						1.50439						1.51685
Nguyen et al. 2012	1.2				1.2		1.2	1.2					1.2			1.2	1.2		1.2	1.2								1.2			1.2			1.2						1.2					1.21555	1.20804
Calculation of emissions according to known best practices																																														1.05407	1.05407	1.11353	1.5
Minimum uncertainty value	1	1	1	1.07442	1.11301	0	1.12487	1.05407	0	0	1.05407	0	1.2	0	0	1.05	1.05	0	1.05	1.05	0	1.05	1.05	0	0	0	1.30007	1.05407	0	1.30007	1.05407	0	1.30007	1.05407	0	0	0	0	1.07442	1.07442	1.30007	1.30007	0	1.21524	1.21555	1.05407	1.05407	1.07516	1.5
Calculation of emissions according to known best practices, for comparison against data quality for reported emissions calculations
Data category	Flow	Amount	Units	Data source (reliability)	Percent of supply covered	Time	Location	Technology details	Reliability	Completeness	Temporal Correlation	Geographical Correlation	Technological Correlation	R	C	Temp	G	Tech	Geometric Standard deviation		Additional uncertainty factors, as defined by Ciroth et al 2016
Emissions	Direct N2O emissions			IPCC Tier 2	Dependent on the percentage of supply covered by the input data to the model	Dependent on the temporal coverage of the input data to the model	Country-specific	Representative	1	3	2	1	1	1	1.05	1.02	1	1	1.05407		Score	R	C	Temp	G	Tech
	Indirect N2O emissions			IPCC Tier 2	Dependent on the percentage of supply covered by the input data to the model	Dependent on the temporal coverage of the input data to the model	Country-specific	Representative	1	3	2	1	1	1	1.05	1.02	1	1	1.05407		1	1	1	1	1	1
	CO2 emissions from lime and urea			IPCC Tier 1	Dependent on the percentage of supply covered by the input data to the model	Dependent on the temporal coverage of the input data to the model	Generic EF used	Representative	2	1	3	2	1	1.05	1	1.1	1.01	1	1.11353		2	1.05	1.02	1.02	1.01	1.05
	Soil carbon changes			IPCC Tirer 2	100	NIR validity	Country-specific	Representative	1	1	1	1	4	1	1	1	1	1.5	1.5		3	1.1	1.05	1.1	1.02	1.2
																					4	1.2	1.1	1.2	1.05	1.5
	Direct N2O emissions		Indirect N2O emissions		CO2 emissions from lime and urea																5	1.5	1.2	1.5	1.1	2
	Completeness	Temporal	Completeness	Temporal	Completeness	Temporal
van Paassen et al. 2019	3	2	3	2	3	3
ecoinvent	no	no	no	no	3	4
Naudin et al 2014	5	4	no	no	no	no
Mosnier et al. 2011	3	5	no	no	no	no
Nguyen et al. 2012	1	4	no	no	1	4

## Sheet: Summary sheet - DE
Return to table of contents
Summary sheet of data points from all sources, and their associated total uncertainties from pedigree matrix entries to be used for choosing which data to be used for modeling farm inputs
	Green fill represents the data point with the lowest total uncertainty value
	Grey fill indicates a specific data point was not included by a specific source
	Yield	Land use			Seed	Nutrient inputs and soil amendments																					Pesticides												Irrigation - Energy use	Field activities				Transport	Post harvest energy use	Emissions
Source	Yield	Land use - seeded area	Land use - harvested area	Land use - Transformation	Seed	Innoculant	Lime	Manure - amount	Manure - Percent of crops receiving manure	Manure - amount applied to percent of crops receiving manure	Manure - type	N - fertilizer Amounts	N - Nutrient inputs	N - fertilizer types and distribution	P fertilizer - amounts	P - nutrient inputs	P fertilizer - types and distribution	K fertilizer - amounts	K - nutrient inputs	K fertilizer - types and distribution	S fertilizer - amounts	S - nutrient inputs	S fertilizer - types and distribution	Other nutrients and soil amendments - amounts	Other nutrients - inputs	Other nutrients and soil amendments - types and distribution	Herbicides - Amounts of each type	Herbicide - active ingredient amounts (total, not type)	Herbicides - Types and distribution	Insecticides - Amounts of each type	Insecticide - active ingredient amounts (total, not type)	Insecticides - types and distribution	Fungicides - Amounts of each type	Fungicide - active ingredient amounts (total, not type)	Fungicides - types and distribution	Other plant protection compounds - Amounts of each type	Other plant protection - active ingredient amounts (total, not type)	Other plant protection compounds - types and distribution	Irrigation - Energy use	Field activities energy use - total energy use	Field activities - activity data fuel use	Field activities - activity data	CO2 emissions from combustion of fuel	Transport	Post harvest energy use	Direct N2O emissions	Indirect N2O emissions	CO2 emissions from lime and urea	Soil carbon changes
van Paassen et al.	1.05407		1.07442	1.07442	1.11301		1.12487	1.05407			1.05407					1.05	1.05		1.05	1.05		1.05	1.05					1.05407	1.05407		1.05407	1.05407		1.05407	1.05407				1.07442	1.07442				1.21524		1.0722	1.0722	1.0722
ecoinvent	1.11301		1.12487	1.12487	1.30007		1.30007					1.30007		1.30007	1.30007		1.30007	1.30007		1.30007		1.30007	1.30007				1.30007		1.30007	1.30007		1.30007	1.30007		1.30007				1.21524	1.30007				1.30007	1.30007	1.20772	1.20772
Eurostat	1	1
Dekker et al. 2013	2.05451				2.05451																																					2.10785	1.20804	2.10785		1.21555
Saget et al. 2021	1.05407						1.05407									1.05407	1.05407		1.05407	1.05407																					1.07442	1.07442						1.07516
Calculation of emissions according to known best practices																																														1.05407	1.05407	1.07516	1.5
Minimum uncertainty value	1	1	1.07442	1.07442	1.11301	0	1.05407	1.05407	0	0	1.05407	1.30007	0	1.30007	1.30007	1.05	1.05	1.30007	1.05	1.05	0	1.05	1.05	0	0	0	1.30007	1.05407	1.05407	1.30007	1.05407	1.05407	1.30007	1.05407	1.05407	0	0	0	1.07442	1.07442	1.07442	1.07442	1.20804	1.21524	1.30007	1.05407	1.05407	1.0722	1.5
Calculation of emissions according to known best practices, for comparison against data quality for reported emissions calculations
Data category	Flow	Amount	Units	Data source (reliability)	Percent of supply covered	Time	Location	Technology details	Reliability	Completeness	Temporal Correlation	Geographical Correlation	Technological Correlation	R	C	Temp	G	Tech	Geometric Standard deviation		Additional uncertainty factors, as defined by Ciroth et al 2016
Emissions	Direct N2O emissions			IPCC Tier 2	Dependent on the percentage of supply covered by the input data to the model	Dependent on the temporal coverage of the input data to the model	Country-specific	Representative	1	3	2	1	1	1	1.05	1.02	1	1	1.05407		Score	R	C	Temp	G	Tech
	Indirect N2O emissions			IPCC Tier 2	Dependent on the percentage of supply covered by the input data to the model	Dependent on the temporal coverage of the input data to the model	Country-specific	Representative	1	3	2	1	1	1	1.05	1.02	1	1	1.05407		1	1	1	1	1	1
	CO2 emissions from lime and urea			IPCC Tier 1	Dependent on the percentage of supply covered by the input data to the model	Dependent on the temporal coverage of the input data to the model	Generic EF used	Representative	2	3	2	2	1	1.05	1.05	1.02	1.01	1	1.07516		2	1.05	1.02	1.02	1.01	1.05
	Soil carbon changes			IPCC Tirer 2	100	NIR validity	Country-specific	Representative	1	1	1	1	4	1	1	1	1	1.5	1.5		3	1.1	1.05	1.1	1.02	1.2
																					4	1.2	1.1	1.2	1.05	1.5
	Direct N2O emissions		Indirect N2O emissions		CO2 emissions from lime and urea																5	1.5	1.2	1.5	1.1	2
	Completeness	Temporal	Completeness	Temporal	Completeness	Temporal
van Paassen et al.	3	2	3	2	3	3
ecoinvent	3	4	3	4	3	4
Saget et al. 2021	no	no	no	no	3	2

## Sheet: Summary sheet - US
Return to table of contents
Summary sheet of data points from all sources, and their associated total uncertainties from pedigree matrix entries to be used for choosing which data to be used for modeling farm inputs
	Green fill represents the data point with the lowest total uncertainty value
	Grey fill indicates a specific data point was not included by a specific source
	Yield	Land use			Seed	Nutrient inputs and soil amendments																					Pesticides												Irrigation - Energy use	Field activities				Transport	Post harvest energy use	Emissions
Source	Yield	Land use - seeded area	Land use - harvested area	Land use - Transformation	Seed	Innoculant	Lime	Manure - amount	Manure - Percent of crops receiving manure	Manure - amount applied to percent of crops receiving manure	Manure - type	N - fertilizer Amounts	N - Nutrient inputs	N - fertilizer types and distribution	P fertilizer - amounts	P - nutrient inputs	P fertilizer - types and distribution	K fertilizer - amounts	K - nutrient inputs	K fertilizer - types and distribution	S fertilizer - amounts	S - nutrient inputs	S fertilizer - types and distribution	Other nutrients and soil amendments - amounts	Other nutrients - inputs	Other nutrients and soil amendments - types and distribution	Herbicides - Amounts of each type	Herbicide - active ingredient amounts (total, not type)	Herbicides - Types and distribution	Insecticides - Amounts of each type	Insecticide - active ingredient amounts (total, not type)	Insecticides - types and distribution	Fungicides - Amounts of each type	Fungicide - active ingredient amounts (total, not type)	Fungicides - types and distribution	Other plant protection compounds - Amounts of each type	Other plant protection - active ingredient amounts (total, not type)	Other plant protection compounds - types and distribution	Irrigation - Energy use	Field activities energy use - total energy use	Field activities - activity data fuel use	Field activities - activity data	CO2 emissions from combustion of fuel	Transport	Post harvest energy use	Direct N2O emissions	Indirect N2O emissions	CO2 emissions from lime and urea	Soil carbon changes
Van paasen et al. 2019	1.05407		1.07442	1.07442	1.11301		1.12487	1.05407			1.05407					1.05407	1.05407		1.05407	1.05407		1.05407	1.05407				1.05407		1.05407	1.05407		1.05407	1.05407		1.05407				1.07442	1.07442				1.21524		1.07516	1.07516	1.07516
Census of agriculture
NASS Database	1.05	1.05	1.05
Bandekar et al. 2022	1.2				1.21022	1.51384							1.21022	1.21022		1.21022	1.21022		1.21022	1.21022								1.29512	1.29512										1.29512					1.02		1.50073	1.50512
Calculation of emissions according to known best practices																																														1.05407	1.05407	1.12534	1.5
Minimum uncertainty value	1.05	1.05	1.05	1.07442	1.11301	1.51384	1.12487	1.05407	0	0	1.05407	0	1.21022	1.21022	0	1.05407	1.05407	0	1.05407	1.05407	0	1.05407	1.05407	0	0	0	1.05407	1.29512	1.05407	1.05407	0	1.05407	1.05407	0	1.05407	0	0	0	1.07442	1.07442	0	0	0	1.02	0	1.05407	1.05407	1.07516	1.5
Calculation of emissions according to known best practices, for comparison against data quality for reported emissions calculations
Data category	Flow	Amount	Units	Data source (reliability)	Percent of supply covered	Time	Location	Technology details	Reliability	Completeness	Temporal Correlation	Geographical Correlation	Technological Correlation	R	C	Temp	G	Tech	Geometric Standard deviation		Additional uncertainty factors, as defined by Ciroth et al 2016
Emissions	Direct N2O emissions			IPCC Tier 2	Dependent on the percentage of supply covered by the input data to the model	Dependent on the temporal coverage of the input data to the model	Country-specific	Representative	1	3	2	1	1	1	1.05	1.02	1	1	1.05407		Score	R	C	Temp	G	Tech
	Indirect N2O emissions			IPCC Tier 2	Dependent on the percentage of supply covered by the input data to the model	Dependent on the temporal coverage of the input data to the model	Country-specific	Representative	1	3	2	1	1	1	1.05	1.02	1	1	1.05407		1	1	1	1	1	1
	CO2 emissions from lime and urea			IPCC Tier 1	Dependent on the percentage of supply covered by the input data to the model	Dependent on the temporal coverage of the input data to the model	Generic EF used	Representative	2	3	3	2	1	1.05	1.05	1.1	1.01	1	1.12534		2	1.05	1.02	1.02	1.01	1.05
	Soil carbon changes			IPCC Tirer 2	100	NIR validity	Country-specific	Representative	1	1	1	1	4	1	1	1	1	1.5	1.5		3	1.1	1.05	1.1	1.02	1.2
																					4	1.2	1.1	1.2	1.05	1.5
	Direct N2O emissions		Indirect N2O emissions		CO2 emissions from lime and urea																5	1.5	1.2	1.5	1.1	2
	Completeness	Temporal	Completeness	Temporal	Completeness	Temporal
Van paasen et al. 2019	3	2	3	2	3	3
Bandekar et al. 2022	2	2	2	2	no	no

[truncated: 22 more sheets: Dried peas, Canada – Bamber, Dried peas, CA - van Paassen, Dried peas, CA - CRSC, CA - StatsCan, SK - Statscan, Dried peas, SK - Bamber, MacWilliam et al. 2014 - CA pea, Dried peas, FR - van Paassen, Dried peas, France – Nemecek , FR - Eurostat database, Peas, FR - Naudin et al. 2014, Peas, FR - Mosnier et al. 2011, Nguyen et al. 2012 FR peas, DE - van Paassen et al. 2019, Dried peas, DE - Nemecek, DE - Eurostat database, Peas, GER - Dekker et al 2013, Peas, GER - Saget et al. 2021, US - Van Paassen et al 2019, US - Census of Ag 2017 …]
