# Supplementary material for: Carbon footprints of commodity field crops in global markets
Source: Research Square preprint supplement (doi:10.21203/rs.3.rs-3359627/v1), 2023-11-16
Supplement: Supplementary file 4 [file a4a3a388498b6f244bc26beb.xlsx]

## Sheet: Table of contents
Sheet number	Sheet name	Description
1	Table of contents	Table of contents with links to each sheet
2	Default pedigree matrix	Default pedigree matrix, as presented in Ciroth et al. 2016
3	Yield temporal pedigree	Alterations made to pedigree matrix for addressing temporal correlation of yield data
4	Completeness pedigree	Alterations made to pedigree matriz for addressing completeness in terms of percentage of supply covered
5	Reliability pedigree	Alterations made to pedigree matrix for addressing reliability of modelled data and single farm measures
6	Summary sheet - SK	Summary of data sources and associated uncertainty for each life cycle inventory category for Saskatchewan
7	Summary sheet - CA	Summary of data sources and associated uncertainty for each life cycle inventory category for Canada
8	Summary sheet - AU	Summary of data sources and associated uncertainty for each life cycle inventory category for Australia
9	Summary sheet - FR	Summary of data sources and associated uncertainty for each life cycle inventory category for France
10	Summary sheet - DE	Summary of data sources and associated uncertainty for each life cycle inventory category for Germany
11	CA - van Paassen et al. 2019	Canadian canola production from van Paassen et al. 2019
12	CA - Nemecek et al. 2015	Dataset for Canadian canola from Nemecek et al. 2015
13	CA - CRSC	Canadian and Saskatchewan canola data from the Canadian Roundtable on Sustainable Crops report by (S&T)2 Consultants "Updated Carbon Footprint for Canola"
14	CA - Statscan	Statistics Canada, Table 32-10-059-01, Canada data
15	CA - MacWilliam et al 2014	MacWilliam et al. 2014 "Life cycle and economic assessment of Western Canadian pulse systems: The inclusion of pulses in crop rotations"
16	Shrestha et al 2014 - Canola_CA	Shrestha et al 2014 Change in carbon footprint of canola production in the Canadian Prairies from 1986 to 2006
17	CA - MacWilliam et al 2016	MacWilliam et al. 2016 "Environmental benefits of canola production in 2010 compared to 1990: A life cycle perspective"
18	Miller Kumar 2013 Canola CA	Miller and Kumar 2013 "Development of emission parameters and net energy ratio for renewable diesel from Canola and Camelina"
19	Alcock et al. 2022 rapeseed CA	Canadian canola data from Alcock et al. 2022 "More sustainable vegetable oil: Balancing productivity with carbon storage opportunities"
20	SK - Statscan	Statistics Canada, Table 32-10-059-01, Saskatchewan data
21	AU - van Paassen et al. 2019	Australian canola production from van Paassen et al. 2019
22	Canola, Aus - Tomkinson 2013	Dataset for Australian canola from Tomkinson 2013
23	au - Ag Comm. 2020-21	Australian agricultural commodities, 2021-22
24	AU - LMP Survey 2016-17	Australian land management practices survey, 2016-2017
25	AU - LMP Survey 2013-14	Australian land management practices survey, 2013-2014
26	AU - AOF annual report 2021	Australian Oilseeds Federation, Annual report 2012
27	AU - GRDC Farm Practices Survey	Australian Grain Research and Development Corporation Farm practices survey, 2022
28	AU - CSIRO Carbon Footprint	CSIRO 2017, greenhouse gas emissions from the cultivation of canola oilseed in Australia
29	Biswas et al. 2011 canola Aus	Biswas et al. 2011 "Biodiesel Production in a Semiarid Environment: A Life Cycle Assessment Approach"
30	Simmons et al. 2019 canola Aus	Simmons et al. 2019 "Life cycle inventories for the Australian grains sector"
31	Browne et al. 2011 canola Aus	Browne et al. 2011 "A comparative analysis of on-farm greenhouse gas emissions from agricultural enterprises in south eastern Australia"
32	Alcock et al. 2022 rapeseed AU	Australian canola data from Alcock et al. 2022 "More sustainable vegetable oil: Balancing productivity with carbon storage opportunities"
33	FR - van Paassen et al. 2019	French canola production from van Paassen et al. 2019
34	Canola, FR - Nemecek 2007	Dataset for French canola from Nemecek 2007
35	Canola, FR - Nemecek 2010	Dataset for French canola from Nemecek 2010
36	FR - EU Oilseed, Protein Crops	European Commission, oilseeds and protein crops production, Directorate general for Agriculture and Rural Development
37	FR - Eurostat database	Eurostat Database, French canola production
38	FR - Évolution des pratiques	Agreste, Évolution des pratiques culturales en grandes cultures entre 2011 et 2017
39	Malca et al. 2014 FR rapeseed	French canola data from Malca et al. 2014 "Environmental life-cycle assessment of rapeseed-based biodiesel: Alternative cultivation systems and locations"
40	Aoun et al. 2016 FR rapeseed	Aoun et al. 2016 "Recommended fertilization practices improve the environmental performance of biodiesel from winter oilseed rape in France"
41	Nguyen et al. 2012 FR rapeseed	Nguyen et al. 2012 "Using environmental constraints to formulate low-impact poultry feeds"
42	Garcia-Condado 2019 residue FR	French canola residue data from Garcia-Condado et al. 2019 "Assessing lignocellulosic biomass production from crop residues in the European Union: Modelling, analysis of the current scenario and drivers of interannual variability"
43	Alcock et al. 2022 rapeseed FR	French canola data from Alcock et al. 2022 "More sustainable vegetable oil: Balancing productivity with carbon storage opportunities"
44	DE - van Paassen et al. 2019	German canola production from van Paassen et al. 2019
45	canola, DE - Nemecek 2007	Dataset for German canola in Nemecek 2007
46	DE - EU Oilseeds, protein crops	European Commission, oilseeds and protein crops production, Directorate general for Agriculture and Rural Development
47	DE- German fertilizer ordinance	German fertilizer ordinance, 2017
48	Malca et al. 2014 DE rapeseed	German canola data from Malca et al. 2014 "Environmental life-cycle assessment of rapeseed-based biodiesel: Alternative cultivation systems and locations"
49	Felten et al. 2013 DE rapeseed	Felten et al. 2013 "Energy balances and greenhouse gas-mitigation potentials of bioenergy cropping systems (Miscanthus, rapeseed, and maize) based on farming conditions in Western Germany"
50	O'Keefe et al. 2017 rapeseed DE	O'Keefe et al. 2017 "Modelling biodiesel production within a regional context: A comparison with RED Benchmark"
51	Nordborg et al. 2014 SI DE rape	Nordborg et al. 2014 "Modeling Potential Freshwater Ecotoxicity Impacts Due to Pesticide Use in Biofuel Feedstock Production: The Cases of Maize, Rapeseed, Salix, Soybean, Sugar Cane, and Wheat"
52	Garcia-Condado 2019 residue DE	German canola residue data from Garcia-Condado et al. 2019 "Assessing lignocellulosic biomass production from crop residues in the European Union: Modelling, analysis of the current scenario and drivers of interannual variability"
53	Alcock et al. 2022 rapeseed DE	German canola data from Alcock et al. 2022 "More sustainable vegetable oil: Balancing productivity with carbon storage opportunities"

## Sheet: Default pedigree matrix
Return to table of contents
Default pedigree matrix, as presented in Ciroth et al. 2016
Reliability	Completeness	Temporal correlation	Geographical correlation	Further technological correlation	Quality Score
Verified data based on measurements	Representative data from all sites relevant for the market considered, over and adequate period to even out normal fluctuations	Less than 3 years of difference to the time period of the data set	Data from area under study	Data from enterprises, processes and materials under study	1
Verified data partly based on assumptions or non-verified data based on measurements	Representative data from > 50% of the sites relevant for the market considered, over an adequate period to even out normal fluctuations	Less than 6 years of difference to the time period of the data set	Average data from larger area in which the area under study is included	Data from processes and materials under study (i.e. identical technology) but from different enterprises	2
Non-verified data partly based on qualified estimates	Representative data from only some sites (<< 50%) relevant for the market considered or > 50% of sites but from shorter periods	Less than 10 years of difference to the time period of the data set	Data from area with similar production conditions	Data from processes and materials under study but from different technology	3
Qualified estimate (e.g. by industrial expert)	Representative data from only one site relevant for the market considered or some sites but from shorter periods	Less than 15 years of difference to the time period of the data set	Data from area with slightly similar production conditions	Data on related processes or materials	4
Non-qualified estimates	Representativeness unknown or data from a small number of sites and from shorter periods	Age of data unknown or more than 15 years of difference to the time period of the data set	Data from unknown or distinctly different area (North America instead of Middle East, OECD-Europe instead of Russia)	Data on related processes on laboratory scale or from different technology	5

## Sheet: Yield temporal pedigree
Return to table of contents
Alterations made to pedigree matrix for addressing temporal correlation of yield data
Temporal correlation	Quality Score
5+ year average with last year less than three years prior	1
3 year average with last year less than three years prior OR 5+ year average with last year 3-6 years prior	2
3 year average with last year 3-6 years prior OR 5+ year average more than 6 years prior	3
1 year value less than 6 years prior OR 3+ year average more than 6 years prior	4
1 year value more than 6 years prior	5

## Sheet: Completeness pedigree
Return to table of contents
Alterations made to pedigree matriz for addressing completeness in terms of percentage of supply covered
Completeness	Quality Score
Representative data from all sites relevant for the market considered, over and adequate period to even out normal fluctuations	1
Representative data from > 50% of the sites relevant for the market considered, over an adequate period to even out normal fluctuations	2
Representative data from only some sites (<< 50%) relevant for the market considered or > 50% of sites but from shorter periods, or representativeness of data unreported	3
Representative data from only one site relevant for the market considered or some sites but from shorter periods, or data derived from recommended practices (i.e., crop growing manuals, etc.)	4
Representative data from a small number of sites and from shorter periods	5

## Sheet: Reliability pedigree
Return to Table of contents
Alterations made to pedigree matrix for addressing reliability of modelled data and single farm measures
Reliability – Score definition	Score
Verified data based on measurements from a large number of sites, such as survey data OR nationally-resolved emissions models, such as IPCC Tier 2	1
Verified data partly based on assumptions or non-verified data based on measurements OR generic emissions models, such as IPCC Tier 1	2
Non-verified data partly based on qualified estimates	3
Qualified estimate (e.g. by industrial expert) OR measured inputs and emissions from a single or small number of field or experimental sites (i.e., <10)	4
Non-qualified estimates	5

## Sheet: Summary sheet - SK
Return to table of contents
Summary sheet of data points from all sources, and their associated total uncertainties from pedigree matrix entries to be used for choosing which data to be used for modeling farm inputs
	Green fill represents the data point with the lowest total uncertainty value
	Grey fill indicates a specific data point was not included by a specific source
	Yield	Land use			Seed	Nutrient inputs and soil amendments																				Pesticides												Irrigation - Energy use	Field activities				Transport	Post harvest energy use	Emissions
Source	Yield	Land use - seeded area	Land use - harvested area	Land use - Transformation	Seed	Lime	Manure - amount	Manure - Percent of crops receiving manure	Manure - amount applied to percent of crops receiving manure	Manure - type	N - fertilizer Amounts	N - Nutrient inputs	N - fertilizer types and distribution	P fertilizer - amounts	P - nutrient inputs	P fertilizer - types and distribution	K fertilizer - amounts	K - nutrient inputs	K fertilizer - types and distribution	S fertilizer - amounts	S - nutrient inputs	S fertilizer - types and distribution	Other nutrients and soil amendments - amounts	Other nutrients - inputs	Other nutrients and soil amendments - types and distribution	Herbicides - Amounts of each type	Herbicide - active ingredient amounts (total, not type)	Herbicides - Types and distribution	Insecticides - Amounts of each type	Insecticide - active ingredient amounts (total, not type)	Insecticides - types and distribution	Fungicides - Amounts of each type	Fungicide - active ingredient amounts (total, not type)	Fungicides - types and distribution	Other plant protection compounds - Amounts of each type	Other plant protection - active ingredient amounts (total, not type)	Other plant protection compounds - types and distribution	Irrigation - Energy use	Field activities energy use - total energy use	Field activities - activity data fuel use	Field activities - activity data	CO2 emissions from combustion of fuel	Transport	Post harvest energy use	Direct N2O emissions	Indirect N2O emissions	CO2 emissions from lime and urea	Soil carbon changes
CRSC	1.0284				1.22959			1.11301				1.22842	1.05407		1.22842	1.05407	1.22842		1.23688		1.22842	1.05407					1.50145	1.50145		1.50145			1.50145			1.50145			1.05				2.33679	2.33679	1.05	1.05		1.5
Statscan	1.02	1.02	1.02
MacWilliam et al. 2016	1.2545				1.21524		1.21524				1.30007		1.30007	1.21524		1.21524		1.21524		1.21524		1.21524					1.57566	1.57566		1.57566	1.57566		1.57566	1.57566						1.23545	1.21524				1.50877	1.51313		1.56814
Calculation of emissions according to known best practices																																													1.05	1.05	1.07516	1.5
Minimum uncertainty value	1.02	1.02	1.02	0	1.21524	0	1.21524	1.11301	0	0	1.30007	1.22842	1.05407	1.21524	1.22842	1.05407	1.22842	1.21524	1.23688	1.21524	1.22842	1.05407	0	0	0	0	1.50145	1.50145	0	1.50145	1.57566	0	1.50145	1.57566	0	1.50145	0	0	1.05	1.23545	1.21524	0	2.33679	2.33679	1.05	1.05	1.07516	1.5
Calculation of emissions according to known best practices, for comparison against data quality for reported emissions calculations
Data category	Flow	Amount	Units	Data source (reliability)	Percent of supply covered	Time	Location	Technology details	Reliability	Completeness	Temporal Correlation	Geographical Correlation	Technological Correlation	R	C	Temp	G	Tech	Geometric Standard deviation		Additional uncertainty factors, as defined by Ciroth et al 2016
Emissions	Direct N2O emissions			IPCC Tier 2	Dependent on the percentage of supply covered by the input data to the model	Dependent on the temporal coverage of the input data to the model	Country-specific	Representative	1	3	1	1	1	1	1.05	1	1	1	1.05		Score	R	C	Temp	G	Tech
	Indirect N2O emissions			IPCC Tier 2	Dependent on the percentage of supply covered by the input data to the model	Dependent on the temporal coverage of the input data to the model	Country-specific	Representative	1	3	1	1	1	1	1.05	1	1	1	1.05		1	1	1	1	1	1
	CO2 emissions from lime and urea			IPCC Tier 1	Dependent on the percentage of supply covered by the input data to the model	Dependent on the temporal coverage of the input data to the model	Generic EF used	Representative	2	3	2	2	1	1.05	1.05	1.02	1.01	1	1.07516		2	1.05	1.02	1.02	1.01	1.05
	Soil carbon changes			IPCC Tirer 2	100	NIR validity	Country-specific	Representative	1	1	1	1	4	1	1	1	1	1.5	1.5		3	1.1	1.05	1.1	1.02	1.2
																					4	1.2	1.1	1.2	1.05	1.5
	Direct N2O emissions		Indirect N2O emissions		CO2 emissions from lime and urea																5	1.5	1.2	1.5	1.1	2
Source	Completeness	Temporal	Completeness	Temporal	Completeness	Temporal
CRSC	3	1	3	1	3	2
StatsCan	no	no	no	no	no	no
MacWilliam et al 2016	3	5	3	5	no	no

## Sheet: Summary sheet - CA
Return to table of contents
Summary sheet of data points from all sources, and their associated total uncertainties from pedigree matrix entries to be used for choosing which data to be used for modeling farm inputs
	Green fill represents the data point with the lowest total uncertainty value
	Grey fill indicates a specific data point was not included by a specific source
	Yield	Land use			Seed	Nutrient inputs and soil amendments																				Pesticides												Irrigation - Energy use	Field activities				Transport	Post harvest energy use	Emissions
Source	Yield	Land use - seeded area	Land use - harvested area	Land use - Transformation	Seed	Lime	Manure - amount per total harvested area	Manure - Percent of crops receiving manure	Manure - amount applied to percent of crops receiving manure	Manure - type	N - fertilizer Amounts	N - Nutrient inputs	N - fertilizer types and distribution	P fertilizer - amounts	P - nutrient inputs	P fertilizer - types and distribution	K fertilizer - amounts	K - nutrient inputs	K fertilizer - types and distribution	S fertilizer - amounts	S - nutrient inputs	S fertilizer - types and distribution	Other nutrients and soil amendments - amounts	Other nutrients - inputs	Other nutrients and soil amendments - types and distribution	Herbicides - Amounts of each type	Herbicide - active ingredient amounts (total, not type)	Herbicides - Types and distribution	Insecticides - Amounts of each type	Insecticide - active ingredient amounts (total, not type)	Insecticides - types and distribution	Fungicides - Amounts of each type	Fungicide - active ingredient amounts (total, not type)	Fungicides - types and distribution	Other plant protection compounds - Amounts of each type	Other plant protection - active ingredient amounts (total, not type)	Other plant protection compounds - types and distribution	Irrigation - Energy use	Field activities energy use - total energy use	Field activities - activity data fuel use	Field activities - activity data	CO2 emissions from combustion of fuel	Transport	Post harvest energy use	Direct N2O emissions	Indirect N2O emissions	CO2 emissions from lime and urea	Soil carbon changes
van Paassen et al. 2019	1.05407	1.07442		1.07442	1.11301	1.11301	1.05407			1.05407	1.05407			1.05407			1.05407			1.05407							1.05407			1.05407			1.05407						1.07442				1.21524	1.50895	1.07516	1.07516	1.07516
Nemecek 2015	1.11301	1.12487		1.12487	1.12487	1.12487					1.12487			1.12487			1.12487			1.12487						1.12487		1.12487	1.12487		1.12487	1.12487		1.12487					1.12487					1.24234	1.11301	1.11301	1.12534
CRSC	1.0284				1.22872		1.11353					1.22842	1.07442		1.22842	1.07442	1.22842			1.22842							1.50091	1.50091		1.50091			1.50091			1.50091		1.20772	1.05106					2.33679	1.05	1.05		1.5
StatsCan	1.02	1.02	1.02
MacWilliam et al 2014	1.61689				1.61689						1.61689		1.61689	1.82522		1.82522				1.82522		1.82522																			1.82522				1.82522	1.61689
Shrestha et al 2014	1.2		1.50439									1.30007																														1.5			1.50439	1.50439
MacWilliam et al 2016	1.2545				1.21524		1.21524				1.30007		1.30007	1.21524		1.21524	1.21524		1.21524	1.21524		1.21524					1.57566	1.57566		1.57566	1.57566		1.57566	1.57566						1.23545	1.21524				1.50877	1.51313		1.56814
Miller Kumar 2013	1.2				1.50877							1.57566			1.57566			1.57566			1.57566					1.82582			1.61755											1.62089			1.62089	1.82883	1.51667			1.51313
Alcock et al 2022	1.07442	1.07442			1.07442	1.07442	1.07442				1.07442			1.07442			1.07442			1.07442							1.07442			1.07442			1.07442						1.07442					1.07442
Calculation of emissions according to known best practices																																													1.05	1.05	1.07516	1.5
Minimum uncertainty value	1.02	1.02	1.02	1.07442	1.07442	1.07442	1.05407			1.05407	1.05407	1.22842	1.07442	1.05407	1.22842	1.07442	1.05407	1.57566	1.21524	1.05407	1.57566	1.21524				1.12487	1.05407	1.12487	1.12487	1.05407	1.12487	1.12487	1.05407	1.12487	0	1.50091	0	1.20772	1.05106	1.23545	1.21524	1.5	1.21524	1.07442	1.05	1.05	1.07516	1.5
					-0.0359173
Calculation of emissions according to known best practices, for comparison against data quality for reported emissions calculations
Data category	Flow	Amount	Units	Data source (reliability)	Percent of supply covered	Time	Location	Technology details	Reliability	Completeness	Temporal Correlation	Geographical Correlation	Technological Correlation	R	C	Temp	G	Tech	Geometric Standard deviation		Additional uncertainty factors, as defined by Ciroth et al 2016
Emissions	Direct N2O emissions			IPCC Tier 2	Dependent on the percentage of supply covered by the input data to the model	Dependent on the temporal coverage of the input data to the model	Country-specific	Representative	1	3	1	1	1	1	1.05	1	1	1	1.05		Score	R	C	Temp	G	Tech
	Indirect N2O emissions			IPCC Tier 2	Dependent on the percentage of supply covered by the input data to the model	Dependent on the temporal coverage of the input data to the model	Country-specific	Representative	1	3	1	1	1	1	1.05	1	1	1	1.05		1	1	1	1	1	1
	CO2 emissions from lime and urea			IPCC Tier 1	Dependent on the percentage of supply covered by the input data to the model	Dependent on the temporal coverage of the input data to the model	Generic EF used	Representative	2	3	2	2	1	1.05	1.05	1.02	1.01	1	1.07516		2	1.05	1.02	1.02	1.01	1.05
	Soil carbon changes			IPCC Tirer 2	100	NIR validity	Country-specific	Representative	1	1	1	1	4	1	1	1	1	1.5	1.5		3	1.1	1.05	1.1	1.02	1.2
																					4	1.2	1.1	1.2	1.05	1.5
	Direct N2O emissions		Indirect N2O emissions		CO2 emissions from lime and urea																5	1.5	1.2	1.5	1.1	2
Source	Completeness	Temporal	Completeness	Temporal	Completeness	Temporal
Agrifootprint	3	2	3	2	3	2
ecoinvent	3	3	3	3	3	3
CRSC	3	1	3	1	no	no
StatsCan	no	no	no	no	no	no
MacWilliam et al 2014	5	5	5	5	no	no
Shrestha et al 2014	3	5	3	5	no	no
MacWilliam et al 2016	3	5	3	5	no	no
Miller Kumar 2013	4	5	no	no	no	no

## Sheet: Summary sheet - Aus
Return to table of contents
Summary sheet of data points from all sources, and their associated total uncertainties from pedigree matrix entries to be used for choosing which data to be used for modeling farm inputs
	Green fill represents the data point with the lowest total uncertainty value
	Grey fill indicates a specific data point was not included by a specific source
	Yield	Land use			Seed	Nutrient inputs and soil amendments																				Pesticides												Irrigation - Energy use	Field activities				Transport	Post harvest energy use	Emissions
Source	Yield	Land use - seeded area	Land use - harvested area	Land use - Transformation	Seed	Lime	Manure - amount	Manure - Percent of crops receiving manure	Manure - amount applied to percent of crops receiving manure	Manure - type	N - fertilizer Amounts	N - Nutrient inputs	N - fertilizer types and distribution	P fertilizer - amounts	P - nutrient inputs	P fertilizer - types and distribution	K fertilizer - amounts	K - nutrient inputs	K fertilizer - types and distribution	S fertilizer - amounts	S - nutrient inputs	S fertilizer - types and distribution	Other nutrients and soil amendments - amounts	Other nutrients - inputs	Other nutrients and soil amendments - types and distribution	Herbicides - Amounts of each type	Herbicide - active ingredient amounts (total, not type)	Herbicides - Types and distribution	Insecticides - Amounts of each type	Insecticide - active ingredient amounts (total, not type)	Insecticides - types and distribution	Fungicides - Amounts of each type	Fungicide - active ingredient amounts (total, not type)	Fungicides - types and distribution	Other plant protection compounds - Amounts of each type	Other plant protection - active ingredient amounts (total, not type)	Other plant protection compounds - types and distribution	Irrigation - Energy use	Field activities energy use - total energy use	Field activities - activity data fuel use	Field activities - activity data	CO2 emissions from combustion of fuel	Transport	Post harvest energy use	Direct N2O emissions	Indirect N2O emissions	CO2 emissions from lime and urea	Soil carbon changes
van Paassen et al. 2019	1.05407		1.07442	1.07442	1.11301	1.12487	1.05407				1.05407		1.05407	1.05407		1.05407	1.05407		1.05407	1.05407		1.05407					1.05407			1.05407			1.05407						1.07442				1.21524	1.50895	1.07516	1.07516	1.07516
Canola, Aus - Tomkinson 2013	1.56399		1.30007	1.30007	1.30007	1.30007					1.30007		1.30007	1.30007		1.30007	1.30007		1.30007	1.30007		1.30007				1.30007			1.30007			1.30007							1.30007				1.30007	1.30007	1.30007	1.30007	1.30007
Australian Agricultural commodities	1.20129		1.02
Land management practices survey 2016-2017											1.50145			1.50145			1.50145			1.50145
Australian Oilseeds Federation annual report	1.05
Grain Research and Development Corporation survey		1.20772				1.50439					1.20772
CSIRO Carbon footprint report	1.11301	1.10224			1.57566	1.57566						1.50512	1.52099		1.57566																								1.57566			1.52099	1.23545		1.20129	1.20129	1.11504
Biswas et al. 2011	1.61689		1.37134								1.37134			1.37134													1.37134			1.37134			1.37134						1.37134				1.56399		1.37134		1.37134
Simmons et al. 2019	1.23545	1.23545				1.23545					1.23545			1.23545			1.23545			1.23545																					1.23545		2.51636		1.05407		1.07442	1.5253
Browne et al 2011	1.50439	1.50439									1.50439			1.50439			1.50439			1.50439																									1.50877	1.50877	1.50877	1.50877
Alcock et al 2022	1.07442	1.07442			1.07442	1.07442	1.07442			1.07442	1.07442			1.07442			1.07442			1.07442							1.07442			1.07442			1.07442						1.07442					1.07442
Calculation of emissions according to known best practices																																													1.0284	1.0284	1.12534	1.5
Minimum uncertainty value	1.05	1.07442	1.02	1.07442	1.07442	1.07442	1.05407	0	0	1.07442	1.05407	1.50512	1.05407	1.05407	1.57566	1.05407	1.05407	0	1.05407	1.05407	0	1.05407	0	0	0	1.30007	1.05407	0	1.30007	1.05407	0	1.30007	1.05407	0	0	0	0	0	1.07442	0	1.23545	1.52099	1.21524	1.07442	1.0284	1.0284	1.07442	1.5
Calculation of emissions according to known best practices, for comparison against data quality for reported emissions calculations
Data category	Flow	Amount	Units	Data source (reliability)	Percent of supply covered	Time	Location	Technology details	Reliability	Completeness	Temporal Correlation	Geographical Correlation	Technological Correlation	R	C	Temp	G	Tech	Geometric Standard deviation		Additional uncertainty factors, as defined by Ciroth et al 2016
Emissions	Direct N2O emissions			IPCC Tier 2	Dependent on the percentage of supply covered by the input data to the model	Dependent on the temporal coverage of the input data to the model	Country-specific	Representative	1	2	2	1	1	1	1.02	1.02	1	1	1.0284		Score	R	C	Temp	G	Tech
	Indirect N2O emissions			IPCC Tier 2	Dependent on the percentage of supply covered by the input data to the model	Dependent on the temporal coverage of the input data to the model	Country-specific	Representative	1	2	2	1	1	1	1.02	1.02	1	1	1.0284		1	1	1	1	1	1
	CO2 emissions from lime and urea			IPCC Tier 1	Dependent on the percentage of supply covered by the input data to the model	Dependent on the temporal coverage of the input data to the model	Generic EF used	Representative	2	3	3	2	1	1.05	1.05	1.1	1.01	1	1.12534		2	1.05	1.02	1.02	1.01	1.05
	Soil carbon changes			IPCC Tirer 2	100	NIR validity	Country-specific	Representative	1	1	1	1	4	1	1	1	1	1.5	1.5		3	1.1	1.05	1.1	1.02	1.2
																					4	1.2	1.1	1.2	1.05	1.5
	Direct N2O emissions		Indirect N2O emissions		CO2 emissions from lime and urea																5	1.5	1.2	1.5	1.1	2
Source	Completeness	Temporal	Completeness	Temporal	Completeness	Temporal
van Paassen et al. 2019	3	2	3	2	3	3
AusLCI	3	4	3	4	3	3
CSIRO Carbon footprint report	2	5	2	5	4	4
Biswas et al. 2011	5	4	5	4	5	4
Simmons et al. 2019	3	3	3	3	3	3
Browne et al 2011	3	5	3	5	no	no
Calculation of emissions according to known best practices

## Sheet: Summary sheet - FR
Return to table of contents
Summary sheet of data points from all sources, and their associated total uncertainties from pedigree matrix entries to be used for choosing which data to be used for modeling farm inputs
	Green fill represents the data point with the lowest total uncertainty value
	Grey fill indicates a specific data point was not included by a specific source
	Yield	Land use			Seed	Nutrient inputs and soil amendments																				Pesticides												Irrigation - Energy use	Field activities				Transport	Post harvest energy use	Emissions
Source	Yield	Land use - seeded area	Land use - harvested area	Land use - Transformation	Seed	Lime	Manure - amount	Manure - Percent of crops receiving manure	Manure - amount applied to percent of crops receiving manure	Manure - type	N - fertilizer Amounts	N - Nutrient inputs	N - fertilizer types and distribution	P fertilizer - amounts	P - nutrient inputs	P fertilizer - types and distribution	K fertilizer - amounts	K - nutrient inputs	K fertilizer - types and distribution	S fertilizer - amounts	S - nutrient inputs	S fertilizer - types and distribution	Other nutrients and soil amendments - amounts	Other nutrients - inputs	Other nutrients and soil amendments - types and distribution	Herbicides - Amounts of each type	Herbicide - active ingredient amounts (total, not type)	Herbicides - Types and distribution	Insecticides - Amounts of each type	Insecticide - active ingredient amounts (total, not type)	Insecticides - types and distribution	Fungicides - Amounts of each type	Fungicide - active ingredient amounts (total, not type)	Fungicides - types and distribution	Other plant protection compounds - Amounts of each type	Other plant protection - active ingredient amounts (total, not type)	Other plant protection compounds - types and distribution	Irrigation - Energy use	Field activities energy use - total energy use	Field activities - activity data fuel use	Field activities - activity data	CO2 emissions from combustion of fuel	Transport	Post harvest energy use	Direct N2O emissions	Indirect N2O emissions	CO2 emissions from lime and urea	Soil carbon changes
FR - van Paassen et al. 2019	1.05407		1.07442	1.07442	1.11301	1.11301	1.05407			1.05407	1.05407		1.05407	1.05407		1.05407	1.05407		1.05407	1.05407		1.05407					1.05407			1.05407			1.05407					1.07442	1.07442				1.21524	1.50895	1.0722	1.0722	1.0722
Canola, FR - Nemecek et al. 2007	1.11301		1.12487	1.12487	1.30007	1.30007					1.30007		1.30007	1.30007		1.30007	1.30007		1.30007	1.30007		1.30007				1.30007			1.30007			1.30007						1.30007	1.30007				1.30007	1.21646	1.20772	1.20772	1.21524
Canola, FR - Nemecek 2010	1.21524		1.21524		1.21524	1.21524					1.21524		1.21524	1.21524		1.21524	1.21524		1.21524	1.21524		1.21524				1.21524			1.21524			1.21524						1.21524	1.21524				1.21524		1.21555	1.21555	1.21555
EU oilseed and protein crops	1											1.05407			1.05407			1.05407									1.50073			1.50073			1.50073
Eurostat
Évolution des pratiques culturales en grandes cultures entre 2011 et 2017								1.05407																				1.05407			1.05407			1.05407
Malca et al. 2014	1.20129	1.20129										1.20129			1.20129			1.20129			1.20129						1.20129			1.20129			1.20129						1.20129					1.20129				1.56051
Aoun et al. 2016	1.07442				2.50397	2.50397	2.50397				2.50397			2.50397			2.50397																							2.50397					1.05407	1.05505		1.05407
Nguyen et al 2012	1.2	1.2			1.5	1.5	1.5					1.5		1.5			1.5										1.5				1.5		1.5						1.5					1.50895	1.50439	1.50439
Garcia Condado 2019	1.10057	1.10057
Alcock et al 2022	1.07442		1.07442		1.07442	1.07442	1.07442				1.07442		1.07442	1.07442		1.07442	1.07442		1.07442	1.07442		1.07442					1.07442			1.07442			1.07442						1.07442					1.07442
Calculation of emissions according to known best practices																																													1.05407	1.05407	1.12534	1.5
Minimum uncertainty value	1	1.10057	1.07442	1.07442	1.07442	1.07442	1.05407	1.05407	0	1.05407	1.05407	1.05407	1.05407	1.05407	1.05407	1.05407	1.05407	1.05407	1.05407	1.05407	1.20129	1.05407	0	0	0	1.21524	1.05407	1.05407	1.21524	1.05407	1.05407	1.21524	1.05407	1.05407	0	0	0	1.07442	1.07442	2.50397	0	0	1.21524	1.07442	1.05407	1.05407	1.0722	1.05407
Data category	Flow	Amount	Units	Data source (reliability)	Percent of supply covered	Time	Location	Technology details	Reliability	Completeness	Temporal Correlation	Geographical Correlation	Technological Correlation	R	C	Temp	G	Tech	Geometric Standard deviation		Additional uncertainty factors, as defined by Ciroth et al 2016
Emissions	Direct N2O emissions			IPCC Tier 2	Dependent on the percentage of supply covered by the input data to the model	Dependent on the temporal coverage of the input data to the model	Country-specific	Representative	1	3	2	1	1	1	1.05	1.02	1	1	1.05407		Score	R	C	Temp	G	Tech
	Indirect N2O emissions			IPCC Tier 2	Dependent on the percentage of supply covered by the input data to the model	Dependent on the temporal coverage of the input data to the model	Country-specific	Representative	1	3	2	1	1	1	1.05	1.02	1	1	1.05407		1	1	1	1	1	1
	CO2 emissions from lime and urea			IPCC Tier 1	Dependent on the percentage of supply covered by the input data to the model	Dependent on the temporal coverage of the input data to the model	Generic EF used	Representative	2	3	3	2	1	1.05	1.05	1.1	1.01	1	1.12534		2	1.05	1.02	1.02	1.01	1.05
	Soil carbon changes			IPCC Tirer 2	100	NIR validity	Country-specific	Representative	1	1	1	1	4	1	1	1	1	1.5	1.5		3	1.1	1.05	1.1	1.02	1.2
																					4	1.2	1.1	1.2	1.05	1.5
	Direct N2O emissions		Indirect N2O emissions		CO2 emissions from lime and urea																5	1.5	1.2	1.5	1.1	2
Source	Completeness	Temporal	Completeness	Temporal	Completeness	Temporal
van Paassen et al. 2019	3	2	3	2	3	3
ecoinvent	3	4	3	4	3	4
agribalyse	3	4	3	4	3	4
Aoun et al. 2016	5	5	5	5	5	5
Nguyen et al 2012	1	5	1	5	1	5

## Sheet: Summary sheet - DE
Return to table of contents
Summary sheet of data points from all sources, and their associated total uncertainties from pedigree matrix entries to be used for choosing which data to be used for modeling farm inputs
	Green fill represents the data point with the lowest total uncertainty value
	Grey fill indicates a specific data point was not included by a specific source
	Yield	Land use			Seed	Nutrient inputs and soil amendments																				Pesticides												Irrigation - Energy use	Field activities				Transport	Post harvest energy use	Emissions
Source	Yield	Land use - seeded area	Land use - harvested area	Land use - Transformation	Seed	Lime	Manure - amount	Manure - Percent of crops receiving manure	Manure - amount applied to percent of crops receiving manure	Manure - type	N - fertilizer Amounts	N - Nutrient inputs	N - fertilizer types and distribution	P fertilizer - amounts	P - nutrient inputs	P fertilizer - types and distribution	K fertilizer - amounts	K - nutrient inputs	K fertilizer - types and distribution	S fertilizer - amounts	S - nutrient inputs	S fertilizer - types and distribution	Other nutrients and soil amendments - amounts	Other nutrients - inputs	Other nutrients and soil amendments - types and distribution	Herbicides - Amounts of each type	Herbicide - active ingredient amounts (total, not type)	Herbicides - Types and distribution	Insecticides - Amounts of each type	Insecticide - active ingredient amounts (total, not type)	Insecticides - types and distribution	Fungicides - Amounts of each type	Fungicide - active ingredient amounts (total, not type)	Fungicides - types and distribution	Other plant protection compounds - Amounts of each type	Other plant protection - active ingredient amounts (total, not type)	Other plant protection compounds - types and distribution	Irrigation - Energy use	Field activities energy use - total energy use	Field activities - activity data fuel use	Field activities - activity data	CO2 emissions from combustion of fuel	Transport	Post harvest energy use	Direct N2O emissions	Indirect N2O emissions	CO2 emissions from lime and urea	Soil carbon changes
Van Paassen et al. 2019	1.05407		1.07442	1.07442	1.11301	1.11301	1.05407			1.05407	1.05407		1.05407	1.05407		1.05407	1.05407		1.05407	1.05407		1.05407					1.05407			1.05407			1.05407						1.07442				1.21524	1.50895	1.07516	1.07516	1.07516
canola, DE - Nemecek et al. 2007	1.22842		1.23545	1.23545	1.37134	1.37134					1.37134		1.37134	1.37134		1.37134	1.37134		1.37134	1.37134		1.37134				1.37134		1.37134	1.37134		1.37134	1.37134		1.37134				1.30007	1.37134				1.37134	1.37134	1.29413	1.29413	1.30007
EU Oilseeds and protein crops	1
German fertilizer ordinance												1.22959
Malca et al. 2014	1.20772		1.50439									1.50877			1.50877			1.50877			1.50877						1.50877			1.50877			1.50877						1.50877					1.50877				1.77799
Felten et al. 2013	1.37134		1.37134		1.37134						1.37134		1.37134	1.37134		1.37134	1.37134		1.37134	1.37134		1.37134					1.37134			1.37134			1.37134							1.37134	1.37134				1.37134	1.37134
O'Keefe et al. 2017	1.5		1.5			1.57566						1.20772			1.57566			1.57566									1.20772			1.20772			1.20772						1.21524						1.2	1.20772
Nordborg et al. 2014																										1.11301		1.11301	1.11301		1.11301	1.11301		1.11301
Garcia-Condado et al. 2019	1.10057		1.10057
Alcock et al. 2022	1.07442		1.07442		1.07442	1.07442	1.07442				1.07442		1.07442	1.07442		1.07442	1.07442		1.07442	1.07442		1.07442					1.07442			1.07442			1.07442						1.07442					1.07442
Calculation of emissions according to known best practices																																													1.05407	1.05407	1.12534	1.5
Minimum uncertainty value	1	0	1.07442	1.07442	1.07442	1.07442	1.05407	0	0	1.05407	1.05407	1.20772	1.05407	1.05407	1.50877	1.05407	1.05407	1.50877	1.05407	1.05407	1.50877	1.05407	0	0	0	1.11301	1.05407	1.11301	1.11301	1.05407	1.11301	1.11301	1.05407	1.11301	0	0	0	1.30007	1.07442	1.37134	1.37134	0	1.21524	1.07442	1.05407	1.05407	1.07516	1.5
Data category	Flow	Amount	Units	Data source (reliability)	Percent of supply covered	Time	Location	Technology details	Reliability	Completeness	Temporal Correlation	Geographical Correlation	Technological Correlation	R	C	Temp	G	Tech	Geometric Standard deviation		Additional uncertainty factors, as defined by Ciroth et al 2016
Emissions	Direct N2O emissions			IPCC Tier 2	Dependent on the percentage of supply covered by the input data to the model	Dependent on the temporal coverage of the input data to the model	Country-specific	Representative	1	3	2	1	1	1	1.05	1.02	1	1	1.05407		Score	R	C	Temp	G	Tech
	Indirect N2O emissions			IPCC Tier 2	Dependent on the percentage of supply covered by the input data to the model	Dependent on the temporal coverage of the input data to the model	Country-specific	Representative	1	3	2	1	1	1	1.05	1.02	1	1	1.05407		1	1	1	1	1	1
	CO2 emissions from lime and urea			IPCC Tier 1	Dependent on the percentage of supply covered by the input data to the model	Dependent on the temporal coverage of the input data to the model	Generic EF used	Representative	2	3	3	2	1	1.05	1.05	1.1	1.01	1	1.12534		2	1.05	1.02	1.02	1.01	1.05
	Soil carbon changes			IPCC Tirer 2	100	NIR validity	Country-specific	Representative	1	1	1	1	4	1	1	1	1	1.5	1.5		3	1.1	1.05	1.1	1.02	1.2
																					4	1.2	1.1	1.2	1.05	1.5
	Direct N2O emissions		Indirect N2O emissions		CO2 emissions from lime and urea																5	1.5	1.2	1.5	1.1	2
Source	Completeness	Temporal	Completeness	Temporal	Completeness	Temporal
Van Paassen et al. 2019	3	2	3	2	3	3
ecoinvent	5	4	5	4	5	4
Malca et al. 2014	3	5	3	5	no	no
Felten et al. 2013	5	4	5	4	no	no
O'Keefe et al. 2017	1	4	1	4	no	no

[truncated: 43 more sheets: CA - van Paassen et al. 2019, CA - Nemecek et al. 2015, CA - CRSC, CA - StatsCan, CA - MacWilliam et al 2014, Shrestha et al 2014 - Canola_CA, CA - MacWilliam et al 2016, Miller Kumar 2013 Canola CA, Alcock et al. 2022  CA rapeseed, SK - Statscan, AU - van Paassen et al. 2019, Canola, Aus - Tomkinson 2013, au - Ag Comm. 2020-21, AU - LMP Survey 2016-17, AU - LMP Survey 2013-14, AU - AOF annual report 2021, AU - GRDC Farm Practices Survey, AU - CSIRO Carbon Footprint, Biswas et al. 2011 canola Aus, Simmons et al. 2019 canola Aus …]
