# Supplementary material for: Carbon footprints of commodity field crops in global markets
Source: Research Square preprint supplement (doi:10.21203/rs.3.rs-3359627/v1), 2023-11-16
Supplement: Supplementary file 5 [file b56b06baf047345035a76735.xlsx]

## Sheet: Table of contents
Sheet number	Sheet name	Description
1	Table of contents	Table of contents
2	Default pedigree matrix	Default pedigree matrix, as presented in Ciroth et al. (2016)
3	Yield temporal pedigree	Alterations made to pedigree matrix for addressing temporal correlation of yield data
4	Completeness pedigree	Alterations made to pedigree matrix for addressing completeness in terms of percentage of supply covered
5	Reliability pedigree	Alterations made to pedigree matrix for addressing reliability of modelled data and single farm measures
6	Summary sheet - SK	Summary of data sources and associated uncertainty for each life cycle inventory category for Saskatchewan
7	Summary sheet - CA	Summary of data sources and associated uncertainty for each life cycle inventory category for Canada
8	Summary sheet - AU	Summary of data sources and associated uncertainty for each life cycle inventory category for Australia
9	Summary sheet - FR	Summary of data sources and associated uncertainty for each life cycle inventory category for France
10	Summary sheet - DE	Summary of data sources and associated uncertainty for each life cycle inventory category for Germany
11	Summary sheet - US	Summary of data sources and associated uncertainty for each life cycle inventory category for the US
12	SK - Statscan	Statstics Canada table 32-10-059-01, Saskatchewan data
13	SK & CA - CRSC	Canadian and Saskatchewan wheat production, Canadian Rountable for Sustainable Crops wheat carbon footprint report, 2022
14	SK & CA - Li et al 2012	Li and Mupondwa 2012 Life cycle assessment of densified wheat straw pellets in the Canadian Prairies
15	CA - van Paassen et al. 2019	Canadian wheat production from van Paassen et al. 2019
16	CA - Nemecek 2015	Canadian wheat production from Nemecek 2015
17	CA - Statscan	Statstics Canada table 32-10-059-01, Canadian data
18	CA - MacWilliam et al 2014 - WW	Wheat after wheat crop rotations, MacWilliam et al 2014 Life cycle and economic assessment of Western Canadian pulse systems: The inclusion of pulses in crop rotations
19	CA - MacWilliam et al 2014 - CW	Wheat after canola crop rotations, MacWilliam et al 2014 Life cycle and economic assessment of Western Canadian pulse systems: The inclusion of pulses in crop rotations
20	CA - MacWilliam et al 2014 - PW	Wheat after dry peas rotations, MacWilliam et al 2014 Life cycle and economic assessment of Western Canadian pulse systems: The inclusion of pulses in crop rotations
21	CA - Pelletier et al 2008	Pelletier et al 2008 Scenario modeling potential eco-efficiency gains from a transition to organic agriculture: Life cycle perspectives on Canadian canola, corn, soy, and wheat production
22	AU - van Paassen et al. 2019	Australian wheat production from van Paassen et al. 2019
23	AU - Nemecek 2015	Australian wheat production from Nemecek 2015
24	AU - Ag. Comm. 2020-21	Australian agricultural commodities, 2021-22
25	AU - Ag. water survey 2020-21	Australian agricultural water use survey, 2020-21
26	AU - LMP 2013-2014	Australian land management practices survey, 2013-2014
27	AU - GRDC Farm practices survey	Australian Grain Research and Development Corporation Farm practices survey, 2022
28	AU - Ridoutt et al 2013	Ridoutt et al 2013 Life cycle assessment of phosphorus use efficient wheat grown in Australia
29	AU - Biswas et al 2010	Biswas et al 2010 Global warming contributions from wheat, sheep meat and wool production in Victoria, Australia e a life cycle assessment
30	AU - Barton et al 2014_No lime	Barton et al 2014 Does growing grain legumes or applying lime cost effectively lower greenhouse gas emissions from wheat production in a semi-arid climate? - No lime treatment
31	AU - Barton et al 2014_Lime	Barton et al 2014 Does growing grain legumes or applying lime cost effectively lower greenhouse gas emissions from wheat production in a semi-arid climate? - Lime treatment
32	AU - Biswas et al 2008	Biswas et al 2008 Global warming potential of wheat production inWestern Australia: a life cycle assessment
33	AU - Brock et al 2016	Brock et al 2016 Cradle-to-farmgate greenhouse gas emissions for 2-year wheat monoculture and break crop–wheat sequences in south-eastern Australia
34	AU - Browne et al 2011	Browne et al 2011, A comparative analysis of on-farm greenhouse gas emissions from agricultural enterprises in south eastern Australia
35	AU - Simmons et al 2019	Simmons et al 2019 Life cycle inventories for the Australian grains sector
36	FR - van Paassen et al. 2019	French wheat production from van Paassen et al. 2019
37	FR - Eurostat	French wheat production data from the Eurostat database
38	FR - Nemecek 2007	French wheat production from Nemecek 2007
39	FR - Évolution des pratiques	Agreste, Évolution des pratiques culturales en grandes cultures entre 2011 et 2017
40	FR - Muñoz et al. 2013	Muñoz et al. 2013 Life cycle assessment of bio-based ethanol produced from different agricultural feedstocks
41	FR - van der Werf	van der Werf 2004 The environmental impacts of the production of concentrated feed: the case of pig feed in Bretagne
42	FR - Brehmer & Sanders 2008	Brehmer and Sanders 2008, Implementing an Energetic Life Cycle Analysis to Prove the Benefits of Lignocellulosic Feedstocks with Protein Separation for the Chemical Industry From the Existing Bioethanol Industry
43	FR - Kulak et al 2014	Kulak et al 2015 Life cycle assessment of bread from several alternative food networks in Europe
44	FR - Nguyen et al 2012	Nguyen et al. 2012 "Using environmental constraints to formulate low-impact poultry feeds"
45	FR - Naudin et al 2013	Naudin et al 2014 Life cycle assessment applied to pea-wheat intercrops: A new method for handling the impacts of co-products
46	DE - van Paassen et al. 2019	German wheat production from van Paassen et al. 2019
47	DE - Eurostat	German wheat production data taken from the Eurostat database
48	DE - Nemecek 2007	German wheat production from Nemecek 2007
49	DE - De Fertilizer Ordinance	German fertilizer ordinance, 2017
50	DE - Buchspies & Kaltschmitt	Buchspies and Kaltschmitt 2018, A consequential assessment of changes in greenhouse gas emissions due to the introduction of wheat straw ethanol in the context of European legislation
51	DE - Nordborg et al 2014	Nordborg et al. 2014 "Modeling Potential Freshwater Ecotoxicity Impacts Due to Pesticide Use in Biofuel Feedstock Production: The Cases of Maize, Rapeseed, Salix, Soybean, Sugar Cane, and Wheat"
52	US - van Paassen et al. 2019	US wheat production from van Paassen et al. 2019
53	US - Nemecek 2007	US wheat production from Nemecek 2007
54	US - USDA LCA Commons	American wheat production, USDA LCA commons
55	US - NASS report	National Agricultural Statistics Service, Agricultural Statistics 2020 document
56	US - Census of Ag 2017	United States Census of Agriculture, 2017
57	US - NASS database	National Agricultural Statistics Service, Online database
58	US - Field to Market	Field to Market 2021, National indicators report
59	US - Pelletier et al 2010	Pelletier et al 2010 Comparative life cycle environmental impacts of three beef production strategies in the Upper Midwestern United States
60	US - Safaripour et al 2021	Safaripour et al 2021 Environmental impact tradeoff considerations for wheat bran-based biocomposite
61	US - Meisterling et al 2008	Meisterling et al 2008 Decisions to reduce greenhouse gases from agriculture and product transport: LCA case study of organic and conventional wheat
62	US - Shrestha et al 2020	Shrestha et al 2020 Life cycle assessment of wheat production and wheat-based crop rotations
63	US - Adom et al 2011	Adom et al 2012 Regional carbon footprint analysis of dairy feeds for milk production in the USA, region 1
64	US - Adom et al 2011 (2)	Adom et al 2012 Regional carbon footprint analysis of dairy feeds for milk production in the USA, region 2
65	US - Adom et al 2011 (3)	Adom et al 2012 Regional carbon footprint analysis of dairy feeds for milk production in the USA, region 3
66	US - Adom et al 2011 (4)	Adom et al 2012 Regional carbon footprint analysis of dairy feeds for milk production in the USA, region 4
67	US - Adom et al 2011 (5)	Adom et al 2012 Regional carbon footprint analysis of dairy feeds for milk production in the USA, region 5
68	US - Kumar Ankathi et al 2019	Kumar Ankathi et al 2019 Life cycle assessment of oilseed crops produced in rotation with dryland cereals in the inland Pacific Northwest

## Sheet: Default pedigree matrix
Return to table of contents
Default pedigree matrix, as defined by Ciroth et al. 2016
Reliability	Completeness	Temporal correlation	Geographical correlation	Further technological correlation	Quality Score
Verified data based on measurements	Representative data from all sites relevant for the market considered, over and adequate period to even out normal fluctuations	Less than 3 years of difference to the time period of the data set	Data from area under study	Data from enterprises, processes and materials under study	1
Verified data partly based on assumptions or non-verified data based on measurements	Representative data from > 50% of the sites relevant for the market considered, over an adequate period to even out normal fluctuations	Less than 6 years of difference to the time period of the data set	Average data from larger area in which the area under study is included	Data from processes and materials under study (i.e. identical technology) but from different enterprises	2
Non-verified data partly based on qualified estimates	Representative data from only some sites (<< 50%) relevant for the market considered or > 50% of sites but from shorter periods	Less than 10 years of difference to the time period of the data set	Data from area with similar production conditions	Data from processes and materials under study but from different technology	3
Qualified estimate (e.g. by industrial expert)	Representative data from only one site relevant for the market considered or some sites but from shorter periods	Less than 15 years of difference to the time period of the data set	Data from area with slightly similar production conditions	Data on related processes or materials	4
Non-qualified estimates	Representativeness unknown or data from a small number of sites and from shorter periods	Age of data unknown or more than 15 years of difference to the time period of the data set	Data from unknown or distinctly different area (North America instead of Middle East, OECD-Europe instead of Russia)	Data on related processes on laboratory scale or from different technology	5

## Sheet: Yield temporal pedigree
Return to table of contents
Alterations made to pedigree matrix for addressing temporal correlation of yield data
Temporal correlation	Quality Score
5+ year average with last year less than three years prior	1
3 year average with last year less than three years prior OR 5+ year average with last year 3-6 years prior	2
3 year average with last year 3-6 years prior OR 5+ year average more than 6 years prior	3
1 year value less than 6 years prior OR 3+ year average more than 6 years prior	4
1 year value more than 6 years prior	5

## Sheet: Completeness pedigree
Return to table of contents
Alterations made to pedigree matrix for addressing completeness in terms of percentage of supply covered
Completeness	Quality Score
Representative data from all sites relevant for the market considered, over and adequate period to even out normal fluctuations	1
Representative data from > 50% of the sites relevant for the market considered, over an adequate period to even out normal fluctuations	2
Representative data from only some sites (<< 50%) relevant for the market considered or > 50% of sites but from shorter periods, or representativeness of data unreported	3
Representative data from only one site relevant for the market considered or some sites but from shorter periods, or data derived from recommended practices (i.e., crop growing manuals, etc.)	4
Representative data from a small number of sites and from shorter periods	5

## Sheet: Reliability pedigree
Return to Table of contents
Alterations made to pedigree matrix for addressing reliability of modelled data and single farm measures
Reliability – Score definition	Score
Verified data based on measurements from a large number of sites, such as survey data OR nationally-resolved emissions models, such as IPCC Tier 2	1
Verified data partly based on assumptions or non-verified data based on measurements OR generic emissions models, such as IPCC Tier 1	2
Non-verified data partly based on qualified estimates	3
Qualified estimate (e.g. by industrial expert) OR measured inputs and emissions from a single or small number of field or experimental sites (i.e., <10)	4
Non-qualified estimates	5

## Sheet: Summary sheet - SK
Return to table of contents
Summary of data sources and associated uncertainty for each life cycle inventory category for Saskatchewan
	Yield and land use				Seed	Nutrient inputs															Pesticide inputs									Field activities				Transport		Post-harvest	Emissions
Source	Yield	Land use - seeded area	Land use - harvested area	Seed	Manure - amount	Manure - type	% of crop receiving manure	Application rate of manure to % of crop receiving manure	N - fertilizer Amounts	N - Nutrient inputs	N - fertilizer types and distribution	P fertilizer - amounts	P - nutrient inputs	P fertilizer - types and distribution	K fertilizer - amounts	K - nutrient inputs	K fertilizer - types and distribution	S fertilizer - amounts	S - nutrient inputs	S fertilizer - types and distribution	Herbicides - Amounts of each type	Herbicide - active ingredient amounts (total, not type)	Herbicides - Types and distribution	Insecticides - Amounts of each type	Insecticide - active ingredient amounts (total, not type)	Insecticides - types and distribution	Fungicides - Amounts of each type	Fungicide - active ingredient amounts (total, not type)	Fungicides - types and distribution	Field activities energy use - total energy use	Field activities - activity data fuel use	Field activities - activity data	CO2 emissions from combustion of fuel	Transport diesel	Transport distance	Post harvest energy use	Direct N2O emissions	Indirect N2O emissions	CO2 emissions from lime and urea	Soil carbon changes
SK - Statscan	1.02	1.02	1.02
SK & CA - CRSC	1.0284			1.22842			1.11301			1.22842	1.5		1.22842	1.5	1.22842			1.22842				1.0284	1.0284		1.0284			1.0284		1.22842						1.23688	1.05	1.05		1.5
SK & SK - Li et al 2012	1.61689			1.61689
Emissions calculations best practices																																					1.05	1.05	1.0722	1.5
Minimum uncertainty values	1.02	1.02	1.02	1.22842			1.11301			1.22842	1.5		1.22842	1.5	1.22842			1.22842				1.0284	1.0284		1.0284			1.0284		1.22842				0		1.23688	1.05	1.05	1.0722	1.5
Calculation of emissions according to known best practices, for comparison against data quality for reported emissions calculations
Data category	Flow	Amount	Units	Data source (reliability)	Percent of supply covered	Time	Location	Technology details	Reliability	Completeness	Temporal Correlation	Geographical Correlation	Technological Correlation	R	C	Temp	G	Tech	Geometric Standard deviation		Additional uncertainty factors, as defined by Ciroth et al 2016
Emissions	Direct N2O emissions			IPCC Tier 2	Dependent on the percentage of supply covered by the input data to the model	Dependent on the temporal coverage of the input data to the model	Country-specific	Representative	1	3	1	1	1	1	1.05	1	1	1	1.05		Score	R	C	Temp	G	Tech
	Indirect N2O emissions			IPCC Tier 2	Dependent on the percentage of supply covered by the input data to the model	Dependent on the temporal coverage of the input data to the model	Country-specific	Representative	1	3	1	1	1	1	1.05	1	1	1	1.05		1	1	1	1	1	1
	CO2 emissions from lime and urea			IPCC Tier 1	Dependent on the percentage of supply covered by the input data to the model	Dependent on the temporal coverage of the input data to the model	Generic EF used	Representative	2	3	1	2	1	1.05	1.05	1	1.01	1	1.0722		2	1.05	1.02	1.02	1.01	1.05
	Soil carbon changes			IPCC Tirer 2	100	NIR validity	Country-specific	Representative	1	1	1	1	4	1	1	1	1	1.5	1.5		3	1.1	1.05	1.1	1.02	1.2
																					4	1.2	1.1	1.2	1.05	1.5
	Direct N2O emissions		Indirect N2O emissions		CO2 emissions from lime and urea																5	1.5	1.2	1.5	1.1	2
Source	Completeness	Temporal	Completeness	Temporal	Completeness	Temporal
SK & CA - CRSC	3	1	3	1	no	no

## Sheet: Summary sheet - CA
Return to table of contents
Summary of data sources and associated uncertainty for each life cycle inventory category for Canada
	Yield and land use				Seed	Nutrient inputs																				Pesticide inputs												Irrigation		Field activities				Transport		Post-harvest	Emissions
Source	Yield	Land use - seeded area	Land use - harvested area	Land use - Transformation	Seed	Lime	Manure - amount	Manure - type	% of crop receiving manure	Application rate of manure to % of crop receiving manure	N - fertilizer Amounts	N - Nutrient inputs	N - fertilizer types and distribution	P fertilizer - amounts	P - nutrient inputs	P fertilizer - types and distribution	K fertilizer - amounts	K - nutrient inputs	K fertilizer - types and distribution	S fertilizer - amounts	S - nutrient inputs	S fertilizer - types and distribution	Other nutrients and soil amendments - amounts	Other nutrients - inputs	Other nutrients and soil amendments - types and distribution	Herbicides - Amounts of each type	Herbicide - active ingredient amounts (total, not type)	Herbicides - Types and distribution	Insecticides - Amounts of each type	Insecticide - active ingredient amounts (total, not type)	Insecticides - types and distribution	Fungicides - Amounts of each type	Fungicide - active ingredient amounts (total, not type)	Fungicides - types and distribution	Other plant protection compounds - Amounts of each type	Other plant protection - active ingredient amounts (total, not type)	Other plant protection compounds - types and distribution	Irrigation - Water use	Irrigation - Energy use	Field activities energy use - total energy use	Field activities - activity data fuel use	Field activities - activity data	CO2 emissions from combustion of fuel	Transport diesel	Transport km or t*km	Post harvest energy use	Direct N2O emissions	Indirect N2O emissions	CO2 emissions from lime and urea
SK & CA - CRSC	1.0284				1.31733				1.20898			1.2545	1.5		1.22842	1.5	1.22842			1.22842							1.02241	1.02241		1.0284			1.0284			1.02241			1.20772	1.22842				1.23688		1.23688	1.05	1.05
SK & CA - Li et al 2012	1.61689				1.61689						1.32229			1.32229			1.32229			1.32229						2.51636
CA - van Paassen et al. 2019	1.05407	1.05407		1.07442	1.11301	1.11301	1.05407	1.05407			1.05407			1.05407			1.05407			1.05407						1.05407			1.05407			1.05407						1.50877	1.07442	1.07442					1.21524	1.50895	1.07516	1.07516	1.07516
CA - Nemecek et al. 2015	1.11301	1.12487		1.12487	1.12487	1.12487					1.12487			1.12487			1.12487			1.12487						1.12487			1.12487			1.12487						1.12487	1.12487	1.12487					1.12487	1.24234	1.11301	1.11301	1.12534
CA - Statscan	1.02	1.02	1.02
CA - MacWilliam et al 2014 - WW, CW & PW	1.61689				1.61689						1.61689			1.82522						1.82522																						1.82522					1.61689	1.61706
CA - Pelletier et al 2008	1.50877				1.50877						1.50877			1.50877													1.50877			1.50877			1.50877								1.50877						1.50877	1.50877	1.50877
Emissions calculations based on best practices																																															1.05	1.05	1.07516
Minimum uncertainty	1.02	1.02	1.02	1.07442	1.11301	1.11301	1.05407	1.05407	1.20898		1.05407	1.2545	1.5	1.05407	1.22842	1.5	1.05407			1.05407						1.05407	1.02241	1.02241	1.05407	1.0284		1.05407	1.0284			1.02241		1.12487	1.07442	1.07442	1.50877	1.82522		1.23688	1.12487	1.23688	1.05	1.05	1.07516
Calculation of emissions according to known best practices, for comparison against data quality for reported emissions calculations
Data category	Flow	Amount	Units	Data source (reliability)	Percent of supply covered	Time	Location	Technology details	Reliability	Completeness	Temporal Correlation	Geographical Correlation	Technological Correlation	R	C	Temp	G	Tech	Geometric Standard deviation		Additional uncertainty factors, as defined by Ciroth et al 2016
Emissions	Direct N2O emissions			IPCC Tier 2	Dependent on the percentage of supply covered by the input data to the model	Dependent on the temporal coverage of the input data to the model	Country-specific	Representative	1	3	1	1	1	1	1.05	1	1	1	1.05		Score	R	C	Temp	G	Tech
	Indirect N2O emissions			IPCC Tier 2	Dependent on the percentage of supply covered by the input data to the model	Dependent on the temporal coverage of the input data to the model	Country-specific	Representative	1	3	1	1	1	1	1.05	1	1	1	1.05		1	1	1	1	1	1
	CO2 emissions from lime and urea			IPCC Tier 1	Dependent on the percentage of supply covered by the input data to the model	Dependent on the temporal coverage of the input data to the model	Generic EF used	Representative	2	3	2	2	1	1.05	1.05	1.02	1.01	1	1.07516		2	1.05	1.02	1.02	1.01	1.05
	Soil carbon changes			IPCC Tirer 2	100	NIR validity	Country-specific	Representative	1	1	1	1	4	1	1	1	1	1.5	1.5		3	1.1	1.05	1.1	1.02	1.2
																					4	1.2	1.1	1.2	1.05	1.5
	Direct N2O emissions		Indirect N2O emissions		CO2 emissions from lime and urea																5	1.5	1.2	1.5	1.1	2
Source	Completeness	Temporal	Completeness	Temporal	Completeness	Temporal
SK & CA - CRSC	3	1	3	1	no	no
CA - van Paassen et al. 2019	3	2	3	2	3	2
CA - Nemecek et al. 2015	3	3	3	3	3	3
CA - MacWilliam et al 2014	5	5	5	5	no	no
CA - Pelletier et al 2008	3	5	3	5	3	5
[truncated: 1 more columns]

## Sheet: Summary sheet - AU
Return to table of contents
Summary of data sources and associated uncertainty for each life cycle inventory category for Australia
	Yield and land use			Seed	Nutrient inputs															Pesticide inputs										Irrigation		Field activities						Post-harvest	Emissions
Source	Yield	Land use - seeded area	Land use - Transformation	Seed	Lime	Manure - amount	Manure - type	N - fertilizer Amounts	N - Nutrient inputs	N - fertilizer types and distribution	P fertilizer - amounts	P - nutrient inputs	P fertilizer - types and distribution	K fertilizer - amounts	K - nutrient inputs	K fertilizer - types and distribution	S fertilizer - amounts	S - nutrient inputs	S fertilizer - types and distribution	Herbicides - Amounts of each type	Herbicide - active ingredient amounts (total, not type)	Herbicides - Types and distribution	Insecticides - Amounts of each type	Insecticide - active ingredient amounts (total, not type)	Insecticides - types and distribution	Fungicides - Amounts of each type	Fungicide - active ingredient amounts (total, not type)	Fungicides - types and distribution	Other plant protection compounds - Amounts of each type	Irrigation - Water use	Irrigation - Energy use	Field activities energy use - total energy use	Field activities - activity data fuel use	Field activities - activity data	CO2 emissions from combustion of fuel	Crop residue management	Transport distance	Post harvest energy use	Direct N2O emissions	Indirect N2O emissions	CO2 emissions from lime and urea	Soil carbon changes
AU - van Paassen et al. 2019	1.05407	1.07442	1.07442	1.11301	1.12487	1.05407	1.05407	1.05407			1.05407			1.05407			1.05407				1.05407			1.05407			1.05407			1.50877	1.07442	1.07442					1.12487	1.50895	1.07516	1.07516	1.07516
AU - Nemecek et al. 2015	1.11301	1.12487	1.12487	1.12487	1.12487			1.12487			1.12487			1.12487			1.12487			1.12487			1.12487			1.12487				1.12487	1.12487	1.12487					1.12487	1.24234	1.11301	1.11301	1.12534
AU - Ag. Comm. 2020-21	1.02
AU - Ag. water survey 2020-21																														1.20129
AU - LMP 2013-2014																																				1.22959
AU - GRDC Farm practices survey					1.50439				1.20772																									1.20772		1.50439
AU - Ridoutt et al 2013	1.15413	1.23545						1.23545			1.23545										1.50877			1.50877			1.50877					1.50877							1.22842	1.22842	1.23574
AU - Biswas et al 2010	1.61689										1.61689									1.8752				1.8752			1.8752							1.61689	1.50877		1.61689		1.61689	1.61689
AU - Barton et al 2014_No lime and lime	1.67185							1.44				1.44			1.44			1.44			1.37134						1.37134					1.67185					1.37134	1.37134	1.44	1.3767	1.3767
AU - Biswas et al 2008																																		1.61689					1.61689		1.61689
AU - Brock et al 2016	1.2545			1.2545	1.31639			1.2545			1.2545									1.2545				1.2545			1.2545							1.2545			1.29512		1.2545	1.2545
AU - Browne et al 2011	1.50439	1.50439						1.50439			1.50439			1.50439			1.50439																			1.50439			1.50877	1.50877	1.50877
AU - Simmons et al 2019	1.56399	1.56399			1.56399			1.56399			1.56399			1.56399			1.56399			1.56399			1.56399			1.56399			1.56399					1.07442		1.07442			1.20898	1.20898	1.20898
Emissions modelling according to best practices																																							1.05407	1.05407	1.07516	1.5
Minimum uncertainty	1.02	1.07442	1.07442	1.11301	1.12487	1.05407	1.05407	1.05407	1.20772		1.05407	1.44		1.05407	1.44		1.05407	1.44		1.12487	1.05407		1.12487	1.05407		1.12487	1.05407		1.56399	1.12487	1.07442	1.07442		1.07442	1.50877	1.07442	1.12487	1.24234	1.05407	1.05407	1.07516	1.5
Calculation of emissions according to known best practices, for comparison against data quality for reported emissions calculations
Data category	Flow	Amount	Units	Data source (reliability)	Percent of supply covered	Time	Location	Technology details	Reliability	Completeness	Temporal Correlation	Geographical Correlation	Technological Correlation	R	C	Temp	G	Tech	Geometric Standard deviation		Additional uncertainty factors, as defined by Ciroth et al 2016
Emissions	Direct N2O emissions			IPCC Tier 2	Dependent on the percentage of supply covered by the input data to the model	Dependent on the temporal coverage of the input data to the model	Country-specific	Representative	1	3	2	1	1	1	1.05	1.02	1	1	1.05407		Score	R	C	Temp	G	Tech
	Indirect N2O emissions			IPCC Tier 2	Dependent on the percentage of supply covered by the input data to the model	Dependent on the temporal coverage of the input data to the model	Country-specific	Representative	1	3	2	1	1	1	1.05	1.02	1	1	1.05407		1	1	1	1	1	1
	CO2 emissions from lime and urea			IPCC Tier 1	Dependent on the percentage of supply covered by the input data to the model	Dependent on the temporal coverage of the input data to the model	Generic EF used	Representative	2	3	2	2	1	1.05	1.05	1.02	1.01	1	1.07516		2	1.05	1.02	1.02	1.01	1.05
	Soil carbon changes			IPCC Tirer 2	100	NIR validity	Country-specific	Representative	1	1	1	1	4	1	1	1	1	1.5	1.5		3	1.1	1.05	1.1	1.02	1.2
																					4	1.2	1.1	1.2	1.05	1.5
	Direct N2O emissions		Indirect N2O emissions		CO2 emissions from lime and urea																5	1.5	1.2	1.5	1.1	2
Source	Completeness	Temporal	Completeness	Temporal	Completeness	Temporal
AU - van Paassen et al. 2019	3	2	3	2	3	2
AU - Nemecek et al. 2015	3	3	3	3	3	3
AU - Ridoutt et al 2013	4	4	4	4	4	4
AU - Biswas et al 2010	5	5	5	5	no	no
AU - Barton et al 2014_No lime and lime	5	4	5	4	5	4
AU - Biswas et al 2008	5	5	no	no	5	5
AU - Brock et al 2016	4	3	4	3	no	no
AU - Browne et al 2011	3	5	3	5	3	5
AU - Simmons et al 2019	3	2	3	2	3	2

## Sheet: Summary sheet - FR
Return to table of contents
Summary of data sources and associated uncertainty for each life cycle inventory category for France
	Yield and land use			Seed	Nutrient inputs													Pesticide inputs												Irrigation		Field activities				Post-harvest	Emissions
Source	Yield	Land use - seeded area	Land use - Transformation	Seed	Lime	Manure - amount	Manure - type	N - fertilizer Amounts	N - Nutrient inputs	N - fertilizer types and distribution	P fertilizer - amounts	P - nutrient inputs	P fertilizer - types and distribution	K fertilizer - amounts	K - nutrient inputs	K fertilizer - types and distribution	S fertilizer - amounts	Herbicides - Amounts of each type	Herbicide - active ingredient amounts (total, not type)	Herbicides - Types and distribution	Insecticides - Amounts of each type	Insecticide - active ingredient amounts (total, not type)	Insecticides - types and distribution	Fungicides - Amounts of each type	Fungicide - active ingredient amounts (total, not type)	Fungicides - types and distribution	Other plant protection compounds - Amounts of each type	Other plant protection - active ingredient amounts (total, not type)	Other plant protection compounds - types and distribution	Irrigation - Water use	Irrigation - Energy use	Field activities energy use - total energy use	Field activities - activity data fuel use	Field activities - activity data	Transport distance	Post harvest energy use	Direct N2O emissions	Indirect N2O emissions	CO2 emissions from lime and urea	Soil carbon changes
FR - van Paassen et al. 2019	1.05407	1.05407	1.07442	1.11301	1.12487	1.05407	1.05407	1.05407			1.05407			1.05407			1.05407		1.05407			1.05407			1.05407					1.50877	1.07442	1.07442			1.21524	1.50895	1.07516	1.07516	1.07516
FR - Eurostat	1
FR - Nemecek et al. 2007	1.20772	1.20772	1.21524	1.21524	1.21524			1.21524			1.21524			1.21524			1.21524	1.21524			1.21524			1.21524						1.21524	1.21524	1.21524			1.21524	1.21646	1.20772	1.20772	1.21555
FR - Évolution des pratiques									1.05407			1.05407								1.05407						1.05407								1.05407
FR - Muñoz et al. 2013	1.37134		1.37134	1.37134	1.37134				1.37134			1.37134			1.37134				1.37134			1.37134			1.37134					1.37134		1.37134			1.37134		1.37134	1.37134		1.37134
FR - van der Werf	1.5			1.56399	1.56399			1.56399			1.56399			1.56399					1.56399			1.56399			1.56399							1.56399					1.56399	1.56399
FR - Brehmer & Sanders 2008	1.50877			1.50877	1.50877				1.50877			1.50877			1.50877				1.50877			1.50877			1.50877					1.50877		1.50877
FR - Kulak et al 2014	1.20772	1.20772		1.20772				1.20772			1.20772			1.20772					1.20772			1.20772			1.20772						1.20772			1.20772			1.20772	1.20772
FR - Nguyen et al 2012	1.5	1.5		1.5	1.5				1.5		1.5			1.5					1.5			1.5			1.5						1.5	1.5				1.50895	1.50458	1.50458
FR - Naudin et al 2013	1.37134			1.37134	1.37134				1.37134		1.37134			1.37134					1.37134			1.37134			1.37134									1.31639			1.21555
Emissions modelling based on best practices																																					1.05407	1.05407	1.07516	1.5
Minimum uncertainty	1	1.05407	1.07442	1.11301	1.12487	1.05407	1.05407	1.05407	1.05407		1.05407	1.05407		1.05407	1.37134		1.05407	1.21524	1.05407	1.05407	1.21524	1.05407	0	1.21524	1.05407	1.05407	0	0	0	1.21524	1.07442	1.07442	0	1.05407	1.21524	1.21646	1.05407	1.05407	1.07516	1.37134
Calculation of emissions according to known best practices, for comparison against data quality for reported emissions calculations
Data category	Flow	Amount	Units	Data source (reliability)	Percent of supply covered	Time	Location	Technology details	Reliability	Completeness	Temporal Correlation	Geographical Correlation	Technological Correlation	R	C	Temp	G	Tech	Geometric Standard deviation		Additional uncertainty factors, as defined by Ciroth et al 2016
Emissions	Direct N2O emissions			IPCC Tier 2	Dependent on the percentage of supply covered by the input data to the model	Dependent on the temporal coverage of the input data to the model	Country-specific	Representative	1	3	2	1	1	1	1.05	1.02	1	1	1.05407		Score	R	C	Temp	G	Tech
	Indirect N2O emissions			IPCC Tier 2	Dependent on the percentage of supply covered by the input data to the model	Dependent on the temporal coverage of the input data to the model	Country-specific	Representative	1	3	2	1	1	1	1.05	1.02	1	1	1.05407		1	1	1	1	1	1
	CO2 emissions from lime and urea			IPCC Tier 1	Dependent on the percentage of supply covered by the input data to the model	Dependent on the temporal coverage of the input data to the model	Generic EF used	Representative	2	3	2	2	1	1.05	1.05	1.02	1.01	1	1.07516		2	1.05	1.02	1.02	1.01	1.05
	Soil carbon changes			IPCC Tirer 2	100	NIR validity	Country-specific	Representative	1	1	1	1	4	1	1	1	1	1.5	1.5		3	1.1	1.05	1.1	1.02	1.2
																					4	1.2	1.1	1.2	1.05	1.5
	Direct N2O emissions		Indirect N2O emissions		CO2 emissions from lime and urea																5	1.5	1.2	1.5	1.1	2
Source	Completeness	Temporal	Completeness	Temporal	Completeness	Temporal
FR - van Paassen et al. 2019	3	2	3	2	3	2
FR - Nemecek et al. 2007	3	4	3	4	3	4
FR - Muñoz et al. 2013	5	4	5	4	no	no
FR - van der Werf	3	5	3	5	no	no
FR - Kulak et al 2014	3	4	3	4	no	no
FR - Nguyen et al 2012	1	5	1	5	no	no
FR - Naudin et al 2013	3	4	no	no	no	no

## Sheet: Summary sheet - DE
Return to table of contents
Summary of data sources and associated uncertainty for each life cycle inventory category for Germany
	Yield and land use			Seed	Nutrient inputs																Pesticide inputs									Irrigation		Field activities				Post-harvest	Emissions
Source	Yield	Land use - seeded area	Land use - Transformation	Seed	Lime	Manure - amount	Manure - type	N - fertilizer Amounts	N - Nutrient inputs	N - fertilizer types and distribution	P fertilizer - amounts	P - nutrient inputs	P fertilizer - types and distribution	K fertilizer - amounts	K - nutrient inputs	K fertilizer - types and distribution	S fertilizer - amounts	Other nutrients and soil amendments - amounts	Other nutrients - inputs	Other nutrients and soil amendments - types and distribution	Herbicides - Amounts of each type	Herbicide - active ingredient amounts (total, not type)	Herbicides - Types and distribution	Insecticides - Amounts of each type	Insecticide - active ingredient amounts (total, not type)	Insecticides - types and distribution	Fungicides - Amounts of each type	Fungicide - active ingredient amounts (total, not type)	Fungicides - types and distribution	Irrigation - Water use	Irrigation - Energy use	Field activities energy use - total energy use	Field activities - activity data fuel use	Field activities - activity data	Transport distance	Post harvest energy use	Direct N2O emissions	Indirect N2O emissions	CO2 emissions from lime and urea	Soil carbon changes
DE - van Paassen et al. 2019	1.05407	1.05407	1.07442	1.11301	1.12487	1.05407	1.05407	1.05407			1.05407			1.05407			1.05407					1.05407			1.05407			1.05407		1.50877	1.07442	1.07442			1.21524	1.50895	1.07516	1.07516	1.07516
DE - Eurostat	1
DE - Nemecek et al. 2007	1.11301	1.11301	1.12487	1.30007	1.30007			1.30007			1.30007			1.30007			1.30007				1.30007			1.30007			1.30007			1.30007	1.30007	1.30007			1.30007	1.21524	1.20772	1.20772	1.21555
DE - De Fertilizer Ordinance									1.22959
DE - Buchspies & Kaltschmitt	1.57566			2.51636					1.56416			1.56416			1.56416				1.56416			2.51636			2.51636			2.51636									1.56416
DE - Nordborg et al 2014																					1.11301			1.11301			1.11301							1.11301
Emissions modelling using best practices																																					1.05407	1.05407	1.07516	1.5
Minimum uncertainty	1	1.05407	1.07442	1.11301	1.12487	1.05407	1.05407	1.05407	1.22959		1.05407	1.56416		1.05407	1.56416		1.05407		1.56416		1.11301	1.05407		1.11301	1.05407		1.11301	1.05407		1.30007	1.07442	1.07442		1.11301	1.21524	1.21524	1.05407	1.05407	1.07516	1.5
Calculation of emissions according to known best practices, for comparison against data quality for reported emissions calculations
Data category	Flow	Amount	Units	Data source (reliability)	Percent of supply covered	Time	Location	Technology details	Reliability	Completeness	Temporal Correlation	Geographical Correlation	Technological Correlation	R	C	Temp	G	Tech	Geometric Standard deviation		Additional uncertainty factors, as defined by Ciroth et al 2016
Emissions	Direct N2O emissions			IPCC Tier 2	Dependent on the percentage of supply covered by the input data to the model	Dependent on the temporal coverage of the input data to the model	Country-specific	Representative	1	3	2	1	1	1	1.05	1.02	1	1	1.05407		Score	R	C	Temp	G	Tech
	Indirect N2O emissions			IPCC Tier 2	Dependent on the percentage of supply covered by the input data to the model	Dependent on the temporal coverage of the input data to the model	Country-specific	Representative	1	3	2	1	1	1	1.05	1.02	1	1	1.05407		1	1	1	1	1	1
	CO2 emissions from lime and urea			IPCC Tier 1	Dependent on the percentage of supply covered by the input data to the model	Dependent on the temporal coverage of the input data to the model	Generic EF used	Representative	2	3	2	2	1	1.05	1.05	1.02	1.01	1	1.07516		2	1.05	1.02	1.02	1.01	1.05
	Soil carbon changes			IPCC Tirer 2	100	NIR validity	Country-specific	Representative	1	1	1	1	4	1	1	1	1	1.5	1.5		3	1.1	1.05	1.1	1.02	1.2
																					4	1.2	1.1	1.2	1.05	1.5
	Direct N2O emissions		Indirect N2O emissions		CO2 emissions from lime and urea																5	1.5	1.2	1.5	1.1	2
Source	Completeness	Temporal	Completeness	Temporal	Completeness	Temporal
DE - van Paassen et al. 2019	3	2	3	2	3	2
DE - Nemecek et al. 2007	3	4	3	4	3	4
DE - Buchspies & Kaltschmitt	3	5	no	no	no	no

[truncated: 58 more sheets: Summary sheet - US, SK - Statscan, SK & CA - CRSC, SK & CA - Li et al 2012, CA - van Paassen et al. 2019, CA - Nemecek 2015, CA - StatsCan, CA - MacWilliam et al 2014 - WW, CA - MacWilliam et al 2014 - CW, CA - MacWilliam et al 2014 - PW, CA - Pelletier et al 2008, AU - van Paassen et al. 2019, AU - Nemecek 2015, AU - Ag. Comm. 2020-21, AU - Ag. water survey 2020-21, AU - LMP 2013-2014, AU - GRDC Farm practices survey, AU - Ridoutt et al 2013, AU - Biswas et al 2010, AU - Barton et al 2014_No lime …]
